1                                   **Heritability and family-based GWAS analyses of the**  
2                                   ***N*-acyl ethanolamine and ceramide lipidome**  
3                                   **reveal genetic influence over circulating lipids**

4           Kathryn A. McGurk,<sup>1,2,\*</sup> Simon G. Williams,<sup>1</sup> Hui Guo,<sup>3</sup> Hugh Watkins,<sup>4,5</sup> Martin  
5           Farrall,<sup>4,5</sup> Heather J. Cordell,<sup>6</sup> Anna Nicolaou,<sup>2,8</sup> Bernard D. Keavney<sup>1,7,8,\*\*</sup>

6

7           <sup>1</sup>Division of Cardiovascular Sciences, Faculty of Biology, Medicine and Health,  
8           Manchester Academic Health Science Centre, University of Manchester, Manchester,  
9           UK

10          <sup>2</sup>Laboratory for Lipidomics and Lipid Biology, Division of Pharmacy and Optometry,  
11          Faculty of Biology, Medicine and Health, Manchester Academic Health Science  
12          Centre, University of Manchester, Manchester, UK.

13          <sup>3</sup>Division of Population Health, Health Services Research & Primary Care, Faculty of  
14          Biology, Medicine and Health, Manchester Academic Health Science Centre,  
15          University of Manchester, UK

16          <sup>4</sup>Division of Cardiovascular Medicine, Radcliffe Department of Medicine, University  
17          of Oxford, Oxford, UK

18          <sup>5</sup>Wellcome Centre for Human Genetics, University of Oxford, Oxford, UK

19          <sup>6</sup>Institute of Genetic Medicine, Newcastle University, Newcastle upon Tyne, UK

20          <sup>7</sup>Manchester Heart Centre, Manchester University NHS Foundation Trust, UK

21          <sup>8</sup>These authors contributed equally to this work

22

23

24           **Email addresses:**

25

26           Kathryn A. McGurk: Kathryn.McGurk@manchester.ac.uk

27           Simon G. Williams: simon.williams2@manchester.ac.uk

28           Hui Guo: hui.guo@manchester.ac.uk

29           Hugh Watkins: hugh.watkins@rdm.ox.ac.uk

30           Martin Farrall: mfarrall@well.ox.ac.uk

31           Heather J. Cordell: heather.cordell@newcastle.ac.uk

32           Anna Nicolaou: Anna.Nicolaou@manchester.ac.uk

33           Bernard D. Keavney: Bernard.Keavney@manchester.ac.uk

34

35

36

37

38

39

40

41           **Correspondence:**

42           \*kathryn.mcgurk@manchester.ac.uk           @KathrynMcGurk

43           \*\*bernard.keavney@manchester.ac.uk           @KeavneyLab

44 **Abstract**

45 Certain signalling lipids of the *N*-acyl ethanolamine (NAE) and ceramide (CER)  
46 classes are emerging as novel biomarkers of cardiovascular disease. We sought to  
47 establish the heritability of plasma NAEs (including endocannabinoid anandamide)  
48 and CERs, and identify common DNA variants influencing the circulating  
49 concentrations of the heritable lipid species. Eleven NAEs and thirty CERs were  
50 analysed in plasma samples from 999 members of 196 British Caucasian families,  
51 using targeted mass spectrometry-based lipidomics (UPLC-MS/MS). Family-based  
52 heritability was estimated and GWAS analyses were undertaken. All lipids were  
53 significantly heritable over a wide range ( $h^2 = 18\%-87\%$ ). A missense variant  
54 (rs324420) in the gene encoding the enzyme fatty acid amide hydrolase (*FAAH*),  
55 which degrades NAEs, associated at GWAS significance ( $P < 5 \times 10^{-8}$ ) with four NAEs  
56 (DHEA, PEA, LEA, VEA). This SNP, previously reported to be associated with  
57 addictive behaviour, was associated with an approximately 10% per-allele difference  
58 in mean plasma NAE species. Additionally, we have extended the previously  
59 described association between rs680379 in the gene encoding the rate limiting step of  
60 CER biosynthesis (*SPTLC3*) and CERs to a wider range of species (e.g.  
61 CER[N(24)S(19)] and rs680379 ( $P = 4.82 \times 10^{-27}$ )). We have shown three novel  
62 associations (*CD83*, *SGPPI*, *FBXO28-DEGS1*) influencing plasma CER traits, two of  
63 which (*SGPPI* and *DEGS1*) implicate CER species in haematological phenotypes.  
64 This first genetic analysis of plasma NAE species, and a wide range of CER  
65 mediators, highlights these bioactive lipids as substantially heritable and influenced  
66 by SNPs in key metabolic enzymes.

## 67 **Introduction**

68

69 Genetic studies in large numbers of individuals have identified loci where common  
70 genetic variation influences the prevalence of the major plasma lipid species, such as  
71 HDL- and LDL-cholesterol, and triglycerides<sup>1,2</sup>. Although lipids are not DNA-  
72 encoded, their activities and metabolism are strongly controlled by DNA-encoded  
73 enzymes and other proteins. Recent advances in targeted bioanalytics have enabled  
74 quantitative analyses of a greater proportion of the mediator lipidome in blood,  
75 supporting attempts to identify genetic associations for low-concentration bioactive  
76 lipid species to potentially find disease biomarkers.

77

78 Bioactive lipids of the *N*-acyl ethanolamine (NAE) and ceramide (CER) classes have  
79 potent roles in inflammation and immunity<sup>3-5</sup>. NAEs are fatty acid derivatives,  
80 derived from membrane phospholipids and degraded by the enzyme fatty acid amide  
81 hydrolase (*FAAH*; Figure 1A). This class of bioactive lipids includes the  
82 endocannabinoid anandamide (AEA), the nuclear factor agonist palmitoyl  
83 ethanolamide (PEA) and a number of other species with roles in neuronal signalling,  
84 pain and obesity<sup>6-9</sup>. The contribution of genetic factors to the variation in NAEs has  
85 not yet been studied.

86

87 Ceramides are derivatives of sphingoid bases (e.g. sphingosine and  
88 dihydrosphingosine) and fatty acids (Figure 1B). The first and rate limiting step<sup>10</sup> of  
89 the *de novo* biosynthesis is catalysed by the enzyme serine palmitoyltransferase, a  
90 heterodimeric protein whose monomers are encoded by the *SPTLC1-3* genes. CER  
91 play important roles in apoptosis<sup>11</sup>. Recently, some circulating CER derivatives of 18-

92 carbon sphingosine and non-hydroxy fatty acids (e.g. CER[N(16)S(18)]) have been  
93 identified as novel biomarkers of cardiovascular death<sup>12</sup>, type-2 diabetes, and insulin  
94 resistance<sup>13</sup>. However, the contribution of genetic factors to the circulating levels of  
95 CER has only been investigated for six species, namely: CER[N(16)S(18)],  
96 CER[N(20)S(18)], CER[N(22)S(18)], CER[N(23)S(18)], CER[N(24)S(18)], and  
97 CER[N(24:1)S(18)], found in plasma and serum via untargeted shotgun  
98 lipidomics<sup>14,15</sup>.

99

100 In this study we investigate the role of genetics in determining plasma levels of 11  
101 NAE and 30 CER species, in 196 British Caucasian families comprising 999  
102 individuals. Using targeted, quantitative lipidomics, we show for the first time that  
103 these bioactive lipid mediators are substantially heritable, and demonstrate that  
104 plasma NAEs and a wide range of CERs are influenced by SNPs in key metabolic  
105 enzymes (*FAAH*, *SPTLC3*, *DEGSI*, *SGPPI*). Furthermore, we identify a novel  
106 inflammatory locus (*CD83*) associated with CER species, and implicate CERs in  
107 haematological phenotypes through *DEGSI* and *SGPPI*.

108 **Subjects and Methods**

109

110 *Family recruitment*

111 Families were recruited for a quantitative genetic study of hypertension and other  
112 cardiovascular risk factors, and selected via a proband with essential hypertension  
113 (secondary hypertension was excluded using standard clinical criteria)<sup>16</sup>. Probands  
114 were recruited from outpatients attending the John Radcliffe Hospital, Oxford  
115 hypertension clinic, or via their family doctors. Included family members were U.K.  
116 residents of self-reported European ancestry and were required to consist of 3 or more  
117 siblings quantitatively assessable for blood pressure if one parent of the sibship was  
118 available for blood sampling, or 4 or more siblings if no parent was available. First,  
119 second and third degree relatives were then recruited to assemble a series of extended  
120 families. The collection protocol obtained ethical clearance from the Central Oxford  
121 Research Ethics Committee (06/Q1605/113) and it corresponds with the principles of  
122 the Declaration of Helsinki. Written informed consent was obtained from all  
123 participants.

124

125 This cohort of extended families has previously been shown to have adequate power  
126 to detect moderate-sized genetic influences on quantitative traits<sup>17,18</sup>. The participants  
127 were fully phenotyped for cardiovascular risk factors, blood biochemical measures,  
128 and anthropometric traits. Non-fasting blood samples were collected, plasma  
129 separated, and stored at -80°C. DNA was extracted from whole blood by standard  
130 methods.

131

132

133 *UPLC/ESI-MS/MS mediator lipidomics*

134 Plasma samples were extracted and analysed by mass spectrometry as previously  
135 described<sup>19,20</sup>. Briefly, lipids were extracted from plasma (1 mL) using chloroform-  
136 methanol in the presence of class specific internal standards: C17S, C17DS, and  
137 CER[N(25)S(18)] (50 pmol/sample; Ceramide/Sphingoid Internal Standard Mixture I,  
138 Avanti Polar Lipids, USA) for CER, and AEA-*d*8 (20 ng/sample; Cayman Chemical  
139 Co., USA) for NAE. Targeted lipidomics was performed on a triple quadrupole mass  
140 spectrometer (Xevo TQS, Waters, UK) with an electrospray ionisation probe coupled  
141 to a UPLC pump (Acquity UPLC, Waters, UK). CER species were separated on a C8  
142 column (2.1 x 100 mm) and NAE were separated on a C18 column (2.1 x 50 mm)  
143 (both Acquity UPLC BEH, 1.7µm, Waters, UK). NAE species were quantified using  
144 calibration lines of synthetic standards (Cayman Chemical); relative quantitation of  
145 CER was based on class specific internal standards (Avanti Polar Lipids). Pooled  
146 plasma samples from healthy volunteers were used to create quality control samples  
147 that were extracted and analysed blindly alongside the familial samples.

148

149 **Statistical analysis**

150 *Covariate adjustment*

151 Systematic error was considered from a variety of sources and assessed for  
152 collinearity; mass spectrometry batch and a trait created to adjust for sample  
153 abnormality (haemolysis or presence of white blood cells; present in 14% of samples)  
154 were included as potential covariates. Ascertainment selection was modelled via  
155 binary hypertension status. The resulting concentrations for each lipid species from  
156 the pooled quality control samples were used for adjustment of systematic errors  
157 during extraction, quantitation, and data processing. The final set of potential

158 covariates included mass spectrometry batch, sample abnormality, quality control  
159 sample measures, age, age<sup>2</sup>, sex, hypertension status, BMI, and total cholesterol. The  
160 lipid measurements were assessed for effect of potential covariates using stepwise  
161 multiple linear regression to identify the best set of predictors, using the ‘caret’  
162 package and ‘leapSeq’ method in R (version 3.5.2) (see Table S1 for predictors).  
163 Multiple linear regression of the best predictors was undertaken using the ‘lm’  
164 function in R. Residuals from the covariate-adjusted regression models were  
165 standardized to have a mean of 0 and a variance of 1. Outliers were assessed using the  
166 R package ‘car’, assessing each observation by testing them as a mean-shift outlier  
167 based on studentized residuals, to remove the most extreme observations (Bonferroni  
168 P-value of P<0.05). Missing values were coded as such in the genetics analyses. As  
169 lipid mediators can exert individual bioactivities, all lipid species were treated  
170 uniquely for all analyses, intra-class correlation analyses are depicted in Figure S1.

171

#### 172 *Genome-wide genotyping quality control*

173 Genotyping was performed using the Illumina 660W-Quad chip on 1,234 individuals  
174 (580 males and 654 females) including 248 founders, at 557,124 SNPs. Quality  
175 control of the genotyping data was undertaken using PLINK<sup>21</sup> (version 1.9). No  
176 duplicate variants were found. SNPs that were identified as Mendelian inconsistencies  
177 (--mendel-multigen) were marked as missing. Gender checks assessed by F-statistic  
178 (--check-sex) showed that gender as inferred from 538,771 chromosomal SNPs  
179 agreed with reported status. SNPs with low genotyping rates (--geno 0.05), low minor  
180 allele frequency (--maf 0.01), and those that failed checks of Hardy-Weinberg  
181 Equilibrium (--hwe 1e-8) were excluded. Individuals with low genotype rates (--mind  
182 0.05) and outlying heterozygosity were removed (0.31 - 0.33 included). Relatedness

183 was assessed by high levels of IBD sharing (--genome and --rel-check) and by  
184 visualisation of pairs of individuals' degree of relatedness (through plotting the  
185 proportion of loci where the pair shares one allele IBD (Z1) by the proportion of loci  
186 where the pair shares zero alleles IBD (Z0)), and two outlier individuals were  
187 removed. Ethnicity was assessed via principal components analysis with genotype  
188 data from the 1,000 Genome Project<sup>22</sup>, which confirmed all participants were of  
189 European/CEU origin. Following quality control, 503,221 autosomal SNPs from  
190 1,219 individuals (216 families) were available for SNP-based heritability  
191 assessments, of which 999 individuals (196 families; 198 founders and 801 non-  
192 founders) had plasma available for lipidomics.

193

#### 194 *Heritability estimates*

195 SNP-based heritability was estimated using GCTA software (version 1.26.0)<sup>23,24</sup>. A  
196 genetic relationship matrix was created from the quality controlled genotyping data  
197 and the --reml command was used to estimate variance of the traits explained by the  
198 genotyped SNPs. A complementary estimation of pedigree-based heritability was  
199 undertaken using the QTDT software (version 2.6.1)<sup>25</sup>, by specifying the -we and -veg  
200 options to compare an environmental only variance model with a polygenic and  
201 environmental variances model. The P-values presented are adjusted for 30 tests  
202 (CER) or 11 tests (NAE) via Bonferonni correction. The least significant adjusted P-  
203 value from the groups of lipid species described are depicted as  $P_{adj} < X$ .

204

#### 205 *Genotyping imputation*

206 Following genotyping quality control, 503,221 autosomal SNPs were available to  
207 inform imputation. Imputation was performed through the Michigan Imputation



208 Server (version v1.0.4)<sup>26</sup>, specifying pre-phasing with Eagle<sup>27</sup> (version 2.3) and  
209 imputation by Minimac3<sup>26</sup> using the European population of the Human Reference  
210 Consortium<sup>28</sup> (version hrc.r1.1.2016). Following imputation, duplicate SNPs and  
211 SNPs with  $r^2 < 0.8$  were removed to generate a final set of 10,652,600 SNPs. Quality  
212 control was undertaken for the imputed data on the 999 individuals with lipidomics  
213 available, as follows: SNPs that were identified as Mendelian inconsistencies (--  
214 mendel-multigen) were marked as missing. SNPs with low call rates (--geno 0.05),  
215 low minor allele frequency (--maf 0.05), and those that failed checks of Hardy-  
216 Weinberg Equilibrium (--hwe 1e-8) were excluded, resulting in a final count of  
217 5,280,459 SNPs available for genome-wide association analyses.

218

#### 219 *Family-based genome-wide association studies*

220 Linear mixed modelling approaches were used to account for family structure.  
221 Family-based genome-wide association analyses were undertaken for each lipid trait  
222 using GCTA software (version 1.26.0), specifying mixed linear model association  
223 analyses (--mlma). Genomic control inflation factors from the GWAS analyses can be  
224 found in Table S2. The least significant P-values of the significantly associated SNPs  
225 ( $P < 5 \times 10^{-8}$ ) are depicted as P<X in the manuscript. Significantly associated SNPs were  
226 analysed by Ensembl API Client (version 1.1.5 on GRCh37.p13) to identify  
227 neighbouring genes. Further analyses were undertaken of the significantly associated  
228 SNPs; expression quantitative trait loci (eQTL) were identified using the GTEx portal  
229 browser (version 8), assessment of previously identified SNPs from GWAS was  
230 undertaken using the GWAS Catalog, and assessment of PheWAS with the UK  
231 Biobank<sup>29</sup> was undertaken using the Gene Atlas Browser (see Web Resources).

232

233 *Two-sample Mendelian randomisation analysis*

234 Two sample Mendelian randomisation (2SMR) analysis was undertaken in R  
235 following the guidelines provided by Davey Smith et al  
236 [<https://mrcieu.github.io/TwoSampleMR/>]<sup>30</sup>. Briefly, selected examples of the  
237 significant associations identified for each class of lipid were analysed by 2SMR for a  
238 number of previously published GWAS of interest. The GWAS significant  
239 associations ( $P < 5 \times 10^{-8}$ ) identified for NAE species PEA, and CER traits  
240 CER[N(22)S(19)], CER[N(24)S(16)], and CER[N(24)S(19)]/CER[N(24)DS(19)]  
241 ratio, were assessed for coronary artery disease (all), addiction (PEA), Type-2  
242 Diabetes (CER[N(22)S(19)]), and blood cell counts (CER[N(24)S(16)] and  
243 CER[N(24)S(19)]/CER[N(24)DS(19)] ratio). Details on the published GWAS used as  
244 outcomes are presented in Table S3. As many GWAS associated SNPs were in  
245 linkage disequilibrium, the following SNPs remained in the analysis after the data  
246 clumping step; rs324420 (*FAAH*; PEA), rs438568 (*SPTLC3*; CER[N(22)S(19)]),  
247 rs7160525 (*SGPPI1*; CER[N(24)S(16)]), and rs4653568 (*DEGS1*; CER[N(24)S(19)]/  
248 CER[N(24)DS(19)] ratio).

## 249 **Results**

### 250 *Population characteristics*

251 Plasma samples of 999 participants from 196 British Caucasian families were  
252 included in the genetic analyses. The families consisted of 1-24 members (mean of 5  
253 members) with plasma available for lipidomics analyses (Figure S2). Participant  
254 descriptions are listed in Table 1.

255

### 256 *Lipidomics descriptive statistics*

257 Of the 11 NAE species identified in plasma, palmitoyl ethanolamide (PEA) was at  
258 highest abundance ( $1.89 \pm 1.36$  ng/ml (mean  $\pm$  SD)), and of the 30 plasma CER  
259 species, CER[N(24)S(18)] was most abundant ( $128.87 \pm 61.00$  pmol/ml). In some  
260 cases, the ratio of product/precursor metabolites involved in specific enzymatic  
261 reactions was measured; this allowed for examination of the genetic variants in  
262 corresponding enzymes (e.g. the ratio CER[NS] to CER[NDS] is indicative of *DEGSI*  
263 activity, Figure 1B). Structure-based summations of total abundance and ratios that  
264 have previously been associated in the literature with cardiovascular risk<sup>12</sup> were also  
265 assessed for genetic associations. A list of the species and measurements studied, and  
266 summary statistics are presented in Table S4.

267

### 268 *Signalling lipid species are highly heritable*

269 The NAE species had estimated heritabilities ranging from 45% to 82%  
270 ( $P_{\text{adj}} < 6.72 \times 10^{-15}$ ), with pentadecanoyl ethanolamide (PDEA) having the highest  
271 estimated heritability. Ceramide species showed a wide range in estimated  
272 heritability. Of the CER classes examined, CER[NS] species had heritabilities  
273 between 18% - 62% ( $P_{\text{adj}} < 4.50 \times 10^{-2}$ ), CER[NDS] species had estimated heritability of

274 32% - 52%, ( $P_{\text{adj}} < 3.00 \times 10^{-11}$ ), while CER[AS], sphingosine-1-phosphate (C18S1P),  
275 sphingosine (C18S) and dihydrosphingosine (C18DS) were all significantly heritable.  
276 Heritability results are depicted in Figure 2 (a detailed list is provided in Table S5).

277

#### 278 *Genome-wide association study of N-acyl ethanolamines*

279 There were conventionally GWAS significant ( $P < 5 \times 10^{-8}$ ) associations between four  
280 NAEs (N-docosahexaenoyl ethanolamide, DHEA; N-linoleoyl ethanolamide, LEA;  
281 N-palmitoyl ethanolamide PEA; vaccinoyl ethanolamide, VEA), as well as the sum of  
282 all NAEs (sumEA), with SNPs in the gene encoding fatty acid amide hydrolase  
283 (*FAAH*; Figure 3, with details in Table S6), which catalyses the degradation of NAEs  
284 (Figure 1A). The leading SNP is a missense variant (rs324420; C385A; P129T) and  
285 eQTL of *FAAH* in multiple tissues including whole blood. Presence of the missense  
286 variant causes the enzyme to display normal catalytic properties but decreased cellular  
287 stability<sup>31</sup> by enhanced sensitivity of the enzyme to proteolytic degradation<sup>32</sup>. The  
288 magnitude of the genetic effect was considerable; for example, participants with the  
289 AA genotype of the lead SNP rs324420 had 22% increased mean plasma  
290 concentration of PEA ( $2.19 \pm 1.57$  ng/ml, n=51) compared to those carrying the CC  
291 genotype ( $1.79 \pm 1.29$  ng/ml, n=639). A LocusZoom plot of the association with the  
292 lipid PEA is depicted in Figure 4, with the 22-chromosome Manhattan plot depicted  
293 in Figure S3.

294

#### 295 *Genome-wide association study of ceramides and related sphingolipids*

296 Seven CER[NS] and two CER[NDS] species were significantly associated with SNPs  
297 in an intergenic region on chromosome 20 (Figure 5, with example Manhattan plot  
298 depicted in Figure S4, and further details in Table S7). Assessing the SNPs using

299 GTE<sub>x</sub> confirmed them as liver eQTLs (Table S8) found 20,000 bases downstream of  
300 the gene encoding the third subunit of serine palmitoyltransferase (*SPTLC3*; Figure  
301 6), which catalyses the rate-limiting step<sup>10</sup> of CER biosynthesis (Figure 1B). The  
302 SNPs are associated with differences in the expression of the *SPTLC3* gene in the  
303 liver, leading to changes in CER production that are reflected in altered plasma levels.  
304 Associated SNPs had considerable phenotypic effects, for example the AA genotype  
305 of the SNP rs680379 was associated with a 48% increase in the concentration of  
306 CER[N(24)S(19)] compared with the GG genotype ( $62.84 \pm 24.86$  pmol/ml [n=148],  
307 and  $42.44 \pm 18.48$  pmol/ml [n=409], respectively). Furthermore, the summed total of  
308 all CER species with 24-carbon non-hydroxy fatty acids, and, independently, those  
309 with 19- and 20-carbon sphingosine bases, were found associated with the same SNPs  
310 at the *SPTLC3* locus (Table S8). A novel association was identified for  
311 CER[N(26)S(19)] at a locus on chromosome 6, upstream to the gene for inflammatory  
312 protein CD83 (e.g. rs6940658,  $P=2.07 \times 10^{-8}$ ; depicted in Figure S5 with further details  
313 in Table S7).

314

#### 315 *Association of ceramides and related traits with hematological phenotypes*

316 The Gene Atlas Browser of PheWAS in the UK Biobank study was used to assess the  
317 association of significant SNPs identified here with the extensive number of  
318 phenotypes measured for the UK Biobank cohort. The ratio of CER[NS] to their  
319 precursor CER[NDS], is indicative of delta 4-desaturase, sphingolipid 1 (*DEGSI*)  
320 activity (Figure 1B). A set of SNPs in the upstream region of the *DEGSI* gene on  
321 chromosome 1 associated with the product/precursor ratio,  
322 CER[N(24)S(19)]/CER[N(24)DS(19)] ( $P=4.34 \times 10^{-8}$ ; depicted in Figure S6 with  
323 further details in Table S7). All significant SNPs were confirmed eQTLs of *DEGSI* in

324 whole blood (Table S8). This locus associated with numerous blood cell phenotypes  
325 in the UKBiobank data (e.g. rs4653568 and mean platelet (thrombocyte) volume;  
326  $P=4.77 \times 10^{-12}$ ; Table S8). A further set of SNPs upstream of the gene encoding  
327 sphingosine-1 phosphate phosphatase (*SGPPI*) were associated with  
328 CER[N(24)S(16)] (e.g. rs7160525,  $P=5.67 \times 10^{-10}$ ; Figure S7). This enzyme is involved  
329 in the recycling of CER[NS] species from sphingosine-1-phosphate and ceramide-1-  
330 phosphate (C1P) (Figure 1B). All significant SNPs at this locus were also associated  
331 with blood cell phenotypes, identified in the UK Biobank data (e.g. rs7160525 and  
332 mean platelet (thrombocyte) volume,  $P=3.28 \times 10^{-29}$ ; Table S8). The significant SNPs  
333 identified at both *SGPPI* and *DEGSI* were assessed by 2SMR using published blood  
334 cell count GWAS as outcome variables. The SNPs at both loci were found significant  
335 using 2SMR ( $P < 0.05$ ) in influencing platelet, red blood cell, and white blood cell  
336 traits. Table S9 describes the results in detail.

337

338 No significant GWAS associations were found with the particular CER species that  
339 have been previously investigated as biomarkers of coronary artery disease and type-2  
340 diabetes (e.g. CER[N(16)S(18)]). The *SPTLC3* locus has associated with these CERs  
341 previously. Therefore, an example CER (CER[N(22)S(19)]) which associated at  
342 GWAS significantly with the *SPTLC3* locus was used to investigate the causality via  
343 two-sample Mendelian randomisation between the identified SNPs in *SPTLC3* with  
344 coronary artery disease and type-2 diabetes. There was no significant association  
345 between the *SPTLC3* locus and the cardiovascular disease endpoints (Table S9).

346 **Discussion**

347 We show, for the first time, the substantial variation in heritability estimated for an  
348 array of signalling lipid mediators found in plasma, including low concentration  
349 members of the NAE and CER classes, and we identify GWAS significant  
350 associations between lipids and variants of the enzymes in their respective metabolic  
351 pathways. We have provided the first GWAS significant evidence of association  
352 between SNPs in the *FAAH* gene and plasma NAEs. Additionally, we have extended  
353 the previously described association between SNPs in the *SPTLC3* gene and plasma  
354 CERs to a wider range of species. Our results indicate that these two genes are the  
355 major loci influencing plasma levels of NAEs and CERs, respectively. In addition, we  
356 have shown novel SNP associations (*CD83*, *SGPPI*, *FBXO28-DEGS1*) influencing  
357 plasma CER species.

358

359 *Genetic analyses of N-acyl ethanolamine species*

360 We show for the first time associations at GWAS significance for NAE species  
361 (DHEA, LEA, PEA, and VEA) with a missense change in the NAE degradation  
362 enzyme FAAH. The association with PEA was identified previously in a single  
363 candidate gene study of mutations in *FAAH* in 114 subjects<sup>33</sup>, which reported the  
364 same direction of effect on plasma AEA, PEA, STEA and OEA species but with P-  
365 values insignificant at genome-wide levels ( $0.003 < P < 0.04$ ). Here, in this study of 999  
366 related participants, we identified additional NAE species significantly associated  
367 with the SNP (DHEA, LEA, and VEA), though we did not find significant association  
368 at the locus for AEA, STEA or OEA species. We observed a similar trend to the  
369 previous paper when comparing the plasma levels of NAE species between

370 participants with the missense AA genotype, and those with the wildtype CC  
371 genotype (Figure S8).

372

373 While the *FAAH* missense SNP rs324420 is not associated with any disease endpoints  
374 identified from GWAS to date, the A allele, associated with higher NAE levels, has  
375 been reported to increase the risk of polysubstance addiction and abuse [MIM:  
376 606581] in three candidate gene studies totaling 863 cases and 2,170 controls<sup>32,34,35</sup>  
377 and to potentially contribute to pain insensitivity<sup>36</sup> [MIM: 618377], obesity<sup>37</sup>, and  
378 anxiety<sup>38,39</sup>. PheWAS analysis using the Gene Atlas UK Biobank online browser  
379 however did not identify significant association in a similar number of UK Biobank  
380 cases of substance abuse/dependency (OR for A allele = 1.10; P = 0.14; 746 cases and  
381 451,518 controls) nor the further 2SMR analyses undertaken here using UK Biobank  
382 addiction treatment codes (18 cases, 462999 controls; Table S9). It is possible that  
383 misclassification bias has affected the UK Biobank PheWAS; among the 451,518 UK  
384 Biobank participants assigned as controls, some reported dependencies on other  
385 substances and behaviours, such as coffee, cigarettes, prescription drugs, and  
386 gambling. The potential implication of NAE species in addiction through the  
387 association with the *FAAH* SNP, warrants further investigation in larger numbers of  
388 cases.

389

390 As direct cannabinoid receptor 1 (CB1) antagonist drugs have caused severe adverse  
391 psychiatric effects<sup>40</sup>, *FAAH* inhibitors are being evaluated as an alternative approach  
392 to modulating endocannabinoid signalling. However, in 2016, a *FAAH* inhibitor  
393 resulted in severe neurological side-effects in a Phase I trial, hypothesised due to off-  
394 target drug effects<sup>41</sup>. As the functional *FAAH* SNP rs324420 did not associate with



395 any adverse phenotypes in the UK Biobank, it is likely that on-target effects of FAAH  
396 inhibitor drugs do not have substantial risks of causing conditions that occurred with  
397 appreciable frequency in UK Biobank.

398

399 *Genetic analyses of ceramides and other sphingolipid species*

400 Narrow-sense heritability has been estimated for six CER (CER[N(16)S(18)],  
401 CER[N(18)S(18)], CER[N(20)S(18)], CER[N(22)S(18)], CER[N(24)S(18)],  
402 CER[N(24:1)S(18)] and the corresponding dihydroceramide species  
403 (CER[N(16)DS(18)], CER[N(18)DS(18)], CER[N(20)DS(18)], CER[N(22)DS(18)],  
404 CER[N(24)DS(18)], CER[N(24:1)DS(18)], showing estimated heritability of 0.37 -  
405 0.51 ( $P < 0.01$ ) for CER[NS] and 0.09 - 0.34 ( $P < 0.01$ ) for CER[NDS] in 42 Mexican  
406 American families<sup>42</sup>. Here, we show assessing a larger array of species, that further  
407 CER[NS] and CER[NDS] were significantly heritable, expanding on these previous  
408 estimates.

409

410 The rs7157785 variant in sphingosine 1-phosphate phosphatase 1 (*SGPPI*), a CER  
411 metabolic enzyme, has been identified previously in GWAS of sphingomyelin<sup>14,15,43</sup>,  
412 total cholesterol<sup>44</sup>, glycerophospholipids<sup>43</sup>, total cholesterol<sup>44</sup>, and the ratio of an  
413 unknown blood lipid (X-08402) to cholesterol<sup>45</sup>. The novel association with  
414 CER[N(24)S(16)] we describe is consistent with the gene's role in influencing  
415 CER[NS] production, through the formation of sphingosine (C18S) for CER[NS]  
416 biosynthesis, and the production of CER[NS] from ceramide 1-phosphate (C1P)  
417 (Figure 1). The other significant SNPs identified at the same locus which associated  
418 with this CER species have been previously identified in further GWAS studies of  
419 blood phospholipids<sup>46</sup>, red cell distribution width<sup>47</sup>, sphingomyelin<sup>46</sup>, and unknown

420 blood metabolite X-10510<sup>45</sup>. All SNPs identified at this locus associated in the  
421 UKBiobank PheWAS assessment, and 2SMR analyses, with multiple blood cell  
422 counts and other hematological phenotypes (Table S8). Association with  
423 hematological phenotypes was also identified for the locus on chromosome 1 at  
424 *DEGSI*, found via the GWAS results analysing the ratio of CER[N(24)S(19)] to  
425 CER[N(24)DS(19)]. CER have been previously shown to stimulate erythrocyte  
426 formation through platelet activating factor<sup>48</sup>. However, further studies will be  
427 required to identify the mechanism of the association between genetically determined  
428 plasma ceramide levels and blood cell phenotypes.

429

430 CER[N(26)S(19)] associated at GWAS with SNPs at a novel locus on chromosome 6,  
431 upstream to the gene encoding the inflammatory protein CD83 ( $P=2.07 \times 10^{-8}$ ), a  
432 member of the immunoglobulin superfamily of membrane receptors expressed by  
433 antigen-presenting white blood cells, leukocytes, and dendritic cells<sup>49</sup>. An interaction  
434 between CD83 and CER is currently unknown, but given the involvement of ceramide  
435 signalling in inflammation and immunity<sup>50,51</sup>, it would be of interest to investigate  
436 further.

437

438 Association between some CER species and the *SPTLC3* SNP rs680379 has been  
439 identified previously through the use of shotgun lipidomics for five CER species  
440 (CER[N(16)S(18)], CER[N(22)S(18)], CER[N(23)S(18)], CER[N(24)S(18)], and  
441 CER[N(24:1)S(18)])<sup>14,15</sup>. Here, we identify associations between an additional seven  
442 CER[NS] and two CER[NDS] plasma species and this SNP, and with other eQTLs of  
443 serine palmitoyltransferase at the same locus; as this enzyme is the rate limiting step  
444 for the *de novo* biosynthesis of CER, this association may have wider implications.

445 The information gathered from the eQTL analysis highlights all of the *SPTLC3*  
446 confirmed eQTLs act in the liver, which is a major site for plasma CER biosynthesis.  
447 PheWAS analysis in UK Biobank, nor 2SMR analysis, did not identify significant  
448 disease associations with the *SPTLC3* locus. A number of CER[NS] species have  
449 been studied as potential biomarkers of cardiovascular disease and diabetes<sup>12,52</sup>. While  
450 GWAS significant associations were not found with these lipids, the extent to which  
451 specific species have a role in cardiovascular disease remains debated<sup>53-60</sup>.

452

453 The sample size analysed here (999 participants) is the largest study analysing this  
454 number of plasma NAE and CER species to date<sup>61</sup>. However, it is still a modest study  
455 for GWAS analyses. The associations we have uncovered suggest that further  
456 investigation of heritable lipid species for which no GWAS association was found in  
457 this study would be of interest.

458 **Supplemental Data**

459 Supplemental Data include nine tables and eight figures.

460

461 **Acknowledgements**

462 We are very grateful to the families involved in this study. K.M. is supported by an

463 MRC Doctoral Award (MR/K501311/1), the University of Manchester President's

464 Doctoral Scholarship, and Doctoral Academy Society Membership Fund. AN is

465 supported in part by the NIHR Manchester Biomedical Research Centre. BK is

466 supported by a BHF Personal Chair.

467

468 **Declaration of interests**

469 The authors declare no competing interests.

470

471 **Web Resources**

472 OMIM: <http://www.omim.org/>

473 GWAS Catalog: <https://www.ebi.ac.uk/gwas/>

474 GTEx Portal: <https://gtexportal.org/>

475 UCSC Genome Browser: <https://genome.ucsc.edu/cgi-bin/hgGateway/>

476 Gene Atlas UKBiobank Browser: <http://geneatlas.roslin.ed.ac.uk/>

477 UKBiobank Data Show case [April 2019]: <http://biobank.ndph.ox.ac.uk/showcase/>

478 LocusZoom: <http://csg.sph.umich.edu/locuszoom/>

479 **References**

- 480 1. Teslovich, T.M., Musunuru, K., Smith, A. V, Edmondson, A.C., Stylianou, I.M.,  
481 Koseki, M., Pirruccello, J.P., Ripatti, S., Chasman, D.I., Willer, C.J., et al. (2010).  
482 Biological, clinical and population relevance of 95 loci for blood lipids. *Nature* 466,  
483 707–713.
- 484 2. Willer, C.J., Schmidt, E.M., Sengupta, S., Peloso, G.M., Gustafsson, S., Kanoni, S.,  
485 Ganna, A., Chen, J., Buchkovich, M.L., Mora, S., et al. (2013). Discovery and  
486 refinement of loci associated with lipid levels. *Nat. Genet.* 45, 1274–1285.
- 487 3. MacEyka, M., and Spiegel, S. (2014). Sphingolipid metabolites in inflammatory  
488 disease. *Nature* 510, 58–67.
- 489 4. Kendall, A.C., and Nicolaou, A. (2013). Bioactive lipid mediators in skin  
490 inflammation and immunity. *Prog. Lipid Res.* 52, 141–164.
- 491 5. Sugamura, K., Sugiyama, S., Nozaki, T., Matsuzawa, Y., Izumiya, Y., Miyata, K.,  
492 Nakayama, M., Kaikita, K., Obata, T., Takeya, M., et al. (2009). Activated  
493 endocannabinoid system in coronary artery disease and anti inflammatory effects of  
494 cannabinoid 1 receptor blockade on macrophages. *Circulation* 119, 28–36.
- 495 6. Devane, W.A., Hanuš, L., Breuer, A., Pertwee, R.G., Stevenson, L.A., Griffin, G.,  
496 Gibson, D., Mandelbaum, A., Etinger, A., and Mechoulam, R. (1992). Isolation and  
497 structure of a brain constituent that binds to the cannabinoid receptor. *Science* (80-. ).  
498 258, 1946–1949.
- 499 7. Wilson, R.I., and Nicoll, R. a (2001). Endogenous cannabinoids mediate retrograde  
500 signalling at hippocampal synapses. *Nature* 410, 588–592.
- 501 8. Hohmann, A.G., Suplita, R.L., Bolton, N.M., Neely, M.H., Fegley, D., Mangieri,  
502 R., Krey, J.F., Michael Walker, J., Holmes, P. V., Crystal, J.D., et al. (2005). An  
503 endocannabinoid mechanism for stress-induced analgesia. *Nature* 435, 1108–1112.

- 504 9. Engeli, S., Böhnke, J., Feldpausch, M., Gorzelniak, K., Janke, J., Bátkai, S., Pacher,  
505 P., Harvey-White, J., Luft, F.C., Sharma, A.M., et al. (2005). Activation of the  
506 peripheral endocannabinoid system in human obesity. *Diabetes* 54, 2838–2843.
- 507 10. Perry, D.K., Carton, J., Shah, A.K., Meredith, F., Uhlinger, D.J., and Hannun,  
508 Y.A. (2000). Serine palmitoyltransferase regulates de novo ceramide generation  
509 during etoposide-induced apoptosis. *J. Biol. Chem.* 275, 9078–9084.
- 510 11. Perry, D.K., and Hannun, Y.A. (1998). The role of ceramide in cell signaling.  
511 *Biochim. Biophys. Acta* 1436, 233–243.
- 512 12. Laaksonen, R., Ekroos, K., Sysi-Aho, M., Hilvo, M., Vihervaara, T., Kauhanen,  
513 D., Suoniemi, M., Hurme, R., März, W., Scharnagl, H., et al. (2016). Plasma  
514 ceramides predict cardiovascular death in patients with stable coronary artery disease  
515 and acute coronary syndromes beyond LDL-cholesterol. *Eur. Heart J.* 37, 1967–1976.
- 516 13. Haus, J.M., Kashyap, S.R., Kasumov, T., Zhang, R., Kelly, K.R., Defronzo, R.A.,  
517 and Kirwan, J.P. (2009). Plasma ceramides are elevated in obese subjects with type 2  
518 diabetes and correlate with the severity of insulin resistance. *Diabetes* 58, 337–343.
- 519 14. Hicks, A.A., Pramstaller, P.P., Johansson, A., Vitart, V., Rudan, I., Ugocsai, P.,  
520 Aulchenko, Y., Franklin, C.S., Liebisch, G., Erdmann, J., et al. (2009). Genetic  
521 determinants of circulating sphingolipid concentrations in European populations.  
522 *PLoS Genet.* 5, e1000672.
- 523 15. Demirkan, A., van Duijn, C.M., Ugocsai, P., Isaacs, A., Pramstaller, P.P.,  
524 Liebisch, G., Wilson, J.F., Johansson, Å., Rudan, I., Aulchenko, Y.S., et al. (2012).  
525 Genome-wide association study identifies novel loci associated with circulating  
526 phospho- and sphingolipid concentrations. *PLoS Genet.* 8, e1002490.
- 527 16. Keavney, B., Mayosi, B., Gaukrodger, N., Imrie, H., Baker, M., Fraser, R.,  
528 Ingram, M., Watkins, H., Farrall, M., Davies, E., et al. (2005). Genetic variation at the

529 locus encompassing 11-beta hydroxylase and aldosterone synthase accounts for  
530 heritability in cortisol precursor (11-deoxycortisol) urinary metabolite excretion. *J.*  
531 *Clin. Endocrinol. Metab.* *90*, 1072–1077.

532 17. Baker, M., Rahman, T., Hall, D., Avery, P.J., Mayosi, B.M., Connell, J.M.C.,  
533 Farrall, M., Watkins, H., and Keavney, B. (2007). The C-532T polymorphism of the  
534 angiotensinogen gene is associated with pulse pressure: A possible explanation for  
535 heterogeneity in genetic association studies of AGT and hypertension. *Int. J.*  
536 *Epidemiol.* *36*, 1356–1362.

537 18. Vickers, M.A., Green, F.R., Terry, C., Mayosi, B.M., Julier, C., Lathrop, M.,  
538 Ratcliffe, P.J., Watkins, H.C., and Keavney, B. (2002). Genotype at a promoter  
539 polymorphism of the interleukin-6 gene is associated with baseline levels of plasma  
540 C-reactive protein. *Cardiovasc. Res.* *53*, 1029–1034.

541 19. Kendall, A.C., Pilkington, S.M., Massey, K. a, Sassano, G., Rhodes, L.E., and  
542 Nicolaou, A. (2015). Distribution of Bioactive Lipid Mediators in Human Skin. *J.*  
543 *Invest. Dermatol.* *135*, 1510–1520.

544 20. Cucchi, D., Camacho-Muñoz, D., Certo, M., Niven, J., Smith, J., Nicolaou, A.,  
545 and Mauro, C. (2019). Omega-3 polyunsaturated fatty acids impinge on CD4+ T cell  
546 motility and adipose tissue distribution via direct and lipid mediator-dependent  
547 effects. *Cardiovasc. Res.* *cvz208*.

548 21. Purcell, S., Neale, B., Todd-Brown, K., Thomas, L., Ferreira, M.A.R., Bender, D.,  
549 Maller, J., Sklar, P., de Bakker, P.I.W., Daly, M.J., et al. (2007). PLINK: A tool set  
550 for whole-genome association and population-based linkage analyses. *Am. J. Hum.*  
551 *Genet.* *81*, 559–575.

552 22. Auton, A., Abecasis, G.R., Altshuler, D.M., Durbin, R.M., Bentley, D.R.,  
553 Chakravarti, A., Clark, A.G., Donnelly, P., Eichler, E.E., Flicek, P., et al. (2015). A

- 554 global reference for human genetic variation. *Nature* 526, 68–74.
- 555 23. Yang, J., Benyamin, B., McEvoy, B.P., Gordon, S., Henders, A.K., Nyholt, D.R.,  
556 Madden, P.A., Heath, A.C., Martin, N.G., Montgomery, G.W., et al. (2010). Common  
557 SNPs explain a large proportion of the heritability for human height. *Nat. Genet.* 42,  
558 565–569.
- 559 24. Zaitlen, N., Kraft, P., Patterson, N., Pasaniuc, B., Bhatia, G., Pollack, S., and  
560 Price, A.L. (2013). Using Extended Genealogy to Estimate Components of  
561 Heritability for 23 Quantitative and Dichotomous Traits. *PLoS Genet.* 9, e1003520.
- 562 25. Abecasis, G.R., Cardon, L.R., and Cookson, W.O. (2000). A general test of  
563 association for quantitative traits in nuclear families. *Am. J. Hum. Genet.* 66, 279–  
564 292.
- 565 26. Das, S., Forer, L., Schönherr, S., Sidore, C., Locke, A.E., Kwong, A., Vrieze, S.I.,  
566 Chew, E.Y., Levy, S., McGue, M., et al. (2016). Next-generation genotype imputation  
567 service and methods. *Nat. Genet.* 48, 1284–1287.
- 568 27. Loh, P.R., Danecek, P., Palamara, P.F., Fuchsberger, C., Reshef, Y.A., Finucane,  
569 H.K., Schoenherr, S., Forer, L., McCarthy, S., Abecasis, G.R., et al. (2016).  
570 Reference-based phasing using the Haplotype Reference Consortium panel. *Nat.*  
571 *Genet.* 48, 1443–1448.
- 572 28. McCarthy, S., Das, S., Kretzschmar, W., Delaneau, O., Wood, A.R., Teumer, A.,  
573 Kang, H.M., Fuchsberger, C., Danecek, P., Sharp, K., et al. (2016). A reference panel  
574 of 64,976 haplotypes for genotype imputation. *Nat. Genet.* 48, 1279–1283.
- 575 29. Sudlow, C., Gallacher, J., Green, J., Sprosen, T., Pell, J., Burton, P., Matthews, P.,  
576 Liu, B., Danesh, J., Downey, P., et al. (2015). UK Biobank: an open access resource  
577 for identifying the causes of a wide range of complex diseases of middle and old Age.  
578 *PLOS Med.* 12, e1001779.



- 579 30. Smith, G.D., and Hemani, G. (2014). Mendelian randomization: Genetic anchors  
580 for causal inference in epidemiological studies. *Hum. Mol. Genet.* 23, R89–R98.
- 581 31. Chiang, K.P., Gerber, A.L., Sipe, J.C., and Cravatt, B.F. (2004). Reduced cellular  
582 expression and activity of the P129T mutant of human fatty acid amide hydrolase:  
583 Evidence for a link between defects in the endocannabinoid system and problem drug  
584 use. *Hum. Mol. Genet.* 13, 2113–2119.
- 585 32. Sipe, J.C., Chiang, K., Gerber, A.L., Beutler, E., and Cravatt, B.F. (2002). A  
586 missense mutation in human fatty acid amide hydrolase associated with problem drug  
587 use. *Proc. Natl. Acad. Sci.* 99, 8394–8399.
- 588 33. Sipe, J.C., Scott, T.M., Murray, S., Harismendy, O., Simon, G.M., Cravatt, B.F.,  
589 and Waalen, J. (2010). Biomarkers of endocannabinoid system activation in severe  
590 obesity. *PLoS One* 5, 1–6.
- 591 34. Flanagan, J.M., Gerber, A.L., Cadet, J.L., Beutler, E., and Sipe, J.C. (2006). The  
592 fatty acid amide hydrolase 385 A/A (P129T) variant: Haplotype analysis of an ancient  
593 missense mutation and validation of risk for drug addiction. *Hum. Genet.* 120, 581–  
594 588.
- 595 35. Sim, M.S., Hatim, A., Reynolds, G.P., and Mohamed, Z. (2013). Association of a  
596 functional FAAH polymorphism with methamphetamine-induced symptoms and  
597 dependence in a Malaysian population. *Pharmacogenomics* 14, 505–514.
- 598 36. Cajanus, K., Holmström, E.J., Wessman, M., Anttila, V., Kaunisto, M.A., and  
599 Kalso, E. (2016). Effect of endocannabinoid degradation on pain: role of FAAH  
600 polymorphisms in experimental and postoperative pain in women treated for breast  
601 cancer. *Pain* 157, 361–369.
- 602 37. Sipe, J.C., Waalen, J., Gerber, A., and Beutler, E. (2005). Overweight and obesity  
603 associated with a missense polymorphism in fatty acid amide hydrolase (FAAH). *Int.*

- 604 J. *Obes.* 29, 755–759.
- 605 38. Dincheva, I., Drysdale, A.T., Hartley, C.A., Johnson, D.C., Jing, D., King, E.C.,  
606 Ra, S., Gray, J.M., Yang, R., DeGruccio, A.M., et al. (2015). FAAH genetic variation  
607 enhances fronto-amygdala function in mouse and human. *Nat. Commun.* 6, 1–9.
- 608 39. Lazary, J., Eszlari, N., Juhasz, G., and Bagdy, G. (2016). Genetically reduced  
609 FAAH activity may be a risk for the development of anxiety and depression in  
610 persons with repetitive childhood trauma. *Eur. Neuropsychopharmacol.* 26, 1020–  
611 1028.
- 612 40. Mach, F., Montecucco, F., and Steffens, S. (2009). Effect of blockage of the  
613 endocannabinoid system by CB1 antagonism on cardiovascular risk. *Pharmacol.*  
614 *Reports* 61, 13–21.
- 615 41. Mallet, C., Dubray, C., and Dualé, C. (2016). FAAH inhibitors in the limelight,  
616 but regrettably. *Int. J. Clin. Pharmacol. Ther.* 54, 498–501.
- 617 42. Bellis, C., Kulkarni, H., Mamtani, M., Kent, J.W., Wong, G., Weir, J.M., Barlow,  
618 C.K., Diego, V., Almeida, M., Dyer, T.D., et al. (2014). Human plasma lipidome is  
619 pleiotropically associated with cardiovascular risk factors and death. *Circ.*  
620 *Cardiovasc. Genet.* 7, 854–863.
- 621 43. Draisma, H.H.M., Pool, R., Kobl, M., Jansen, R., Petersen, A.-K., Vaarhorst,  
622 A.A.M., Yet, I., Haller, T., Demirkan, A., Esko, T., et al. (2015). Genome-wide  
623 association study identifies novel genetic variants contributing to variation in blood  
624 metabolite levels. *Nat. Commun.* 6, 7208.
- 625 44. Klarin, D., Damrauer, S.M., Cho, K., Sun, Y. V., Teslovich, T.M., Honerlaw, J.,  
626 Gagnon, D.R., DuVall, S.L., Li, J., Peloso, G.M., et al. (2018). Genetics of blood  
627 lipids among ~300,000 multi-ethnic participants of the Million Veteran Program. *Nat.*  
628 *Genet.* 50, 1514–1523.

- 629 45. Shin, S.Y., Fauman, E.B., Petersen, A.K., Krumsiek, J., Santos, R., Huang, J.,  
630 Arnold, M., Erte, I., Forgetta, V., Yang, T.P., et al. (2014). An atlas of genetic  
631 influences on human blood metabolites. *Nat. Genet.* *46*, 543–550.
- 632 46. Li, Y., Sekula, P., Wuttke, M., Wahrheit, J., Hausknecht, B., Schultheiss, U.T.,  
633 Gronwald, W., Schlosser, P., Tucci, S., Ekici, A.B., et al. (2018). Genome-wide  
634 association studies of metabolites in patients with CKD identify multiple loci and  
635 illuminate tubular transport mechanisms. *J. Am. Soc. Nephrol.* *29*, 1513–1524.
- 636 47. Astle, W.J., Elding, H., Jiang, T., Allen, D., Ruklisa, D., Mann, A.L., Mead, D.,  
637 Bouman, H., Riveros-Mckay, F., Kostadima, M.A., et al. (2016). The Allelic  
638 Landscape of Human Blood Cell Trait Variation and Links to Common Complex  
639 Disease. *Cell* *167*, 1415–1429.
- 640 48. Lang, P.A., Kempe, D.S., Tanneur, V., Eisele, K., Klarl, B.A., Myssina, S.,  
641 Jendrossek, V., Ishii, S., Shimizu, T., Waidmann, M., et al. (2005). Stimulation of  
642 erythrocyte ceramide formation by platelet-activating factor. *J. Cell Sci.* *118*, 1233–  
643 1243.
- 644 49. Ju, X., Silveira, P.A., Hsu, W.-H., Elgundi, Z., Alingcastre, R., Verma, N.D.,  
645 Fromm, P.D., Hsu, J.L., Bryant, C., Li, Z., et al. (2016). The Analysis of CD83  
646 Expression on Human Immune Cells Identifies a Unique CD83 + -Activated T Cell  
647 Population. *J. Immunol.* *197*, 4613–4625.
- 648 50. Maceyka, M., and Spiegel, S. (2014). Sphingolipid metabolites in inflammatory  
649 disease. *Nature* *510*, 58–67.
- 650 51. Hannun, Y.A., and Obeid, L.M. (2008). Principles of bioactive lipid signalling:  
651 lessons from sphingolipids. *Nat. Rev. Mol. Cell Biol.* *9*, 139–150.
- 652 52. Hilvo, M., Salonurmi, T., Havulinna, A.S., Kauhanen, D., Pedersen, E.R., Tell,  
653 G.S., Meyer, K., Teeriniemi, A.M., Laatikainen, T., Jousilahti, P., et al. (2018).

- 654 Ceramide stearic to palmitic acid ratio predicts incident diabetes. *Diabetologia* *61*,  
655 1424–1434.
- 656 53. Wang, D.D., Toledo, E., Hruby, A., Rosner, B.A., Willett, W.C., Sun, Q.,  
657 Razquin, C., Zheng, Y., Ruiz-Canela, M., Guasch-Ferré, M., et al. (2017). Plasma  
658 ceramides, mediterranean diet, and incident cardiovascular disease in the PREDIMED  
659 trial. *Circulation* *135*, 2028–2040.
- 660 54. Lopez, X., Goldfine, A.B., Holland, W.L., Gordillo, R., and Scherer, P.E. (2013).  
661 Plasma ceramides are elevated in female children and adolescents with type 2  
662 diabetes. *J. Pediatr. Endocrinol. Metab.* *26*, 995–998.
- 663 55. Jensen, P.N., Fretts, A.M., Yu, C., Hoofnagle, A.N., Umans, J.G., Howard, B. V.,  
664 Sitlani, C.M., Siscovick, D.S., King, I.B., Sotoodehnia, N., et al. (2019). Circulating  
665 sphingolipids, fasting glucose, and impaired fasting glucose: The Strong Heart Family  
666 Study. *EBioMedicine* *41*, 44–49.
- 667 56. Lemaitre, R.N., Yu, C., Hoofnagle, A., Hari, N., Jensen, P., Fretts, A.M., Umans,  
668 J.G., Howard, B. V., Sitlani, C.M., Siscovick, D.S., et al. (2018). Circulating  
669 sphingolipids, insulin, HOMA-IR and HOMA-B: The Strong Heart Family Study  
670 Running title: Sphingolipids and insulin resistance markers. *Diabetes* *67*, 1663–1672.
- 671 57. Yu, J., Pan, W., Shi, R., Yang, T., Li, Y., Yu, G., Bai, Y., Schuchman, E.H., He,  
672 X., and Zhang, G. (2015). Ceramide Is Upregulated and Associated With Mortality in  
673 Patients With Chronic Heart Failure. *Can. J. Cardiol.* *31*, 357–363.
- 674 58. de Carvalho, L.P., Tan, S.H., Ow, G.S., Tang, Z., Ching, J., Kovalik, J.P., Poh,  
675 S.C., Chin, C.T., Richards, A.M., Martinez, E.C., et al. (2018). Plasma Ceramides as  
676 Prognostic Biomarkers and Their Arterial and Myocardial Tissue Correlates in Acute  
677 Myocardial Infarction. *JACC Basic to Transl. Sci.* *3*, 163–175.
- 678 59. Pan, W., Yu, J., Shi, R., Yan, L., Yang, T., Li, Y., Zhang, Z., Yu, G., Bai, Y.,

679 Schuchman, E.H., et al. (2014). Elevation of ceramide and activation of secretory acid  
680 sphingomyelinase in patients with acute coronary syndromes. *Coron. Artery Dis.* 25,  
681 230–235.

682 60. Bergman, B.C., Brozinick, J.T., Strauss, A., Bacon, S., Kerege, A., Bui, H.H.,  
683 Sanders, P., Siddall, P., Kuo, M.S., and Perreault, L. (2015). Serum sphingolipids:  
684 relationships to insulin sensitivity and changes with exercise in humans. *Am. J.*  
685 *Physiol. Endocrinol. Metab.* 309, 398–408.

686 61. Hinterwirth, H., Stegemann, C., and Mayr, M. (2014). Lipidomics: Quest for  
687 molecular lipid biomarkers in cardiovascular disease. *Circ. Cardiovasc. Genet.* 7,  
688 941–954.

689

## Figure Legends

### Figure 1: Schematic overview of the biosynthetic pathways for (A) *N*-acyl ethanolamines and (B) ceramides

A) *N*-acyl ethanolamine species (NAE), including the endocannabinoid anandamide (AEA), are produced through four independent enzymatic pathways from the membrane phospholipid precursor (*N*-acyl phosphatidylethanolamine; NAPE). Fatty acid amide hydrolase (*FAAH*) degrades NAEs to free fatty acids (such as arachidonic acid for AEA) and ethanolamine. NAEs have signalling roles in pain, obesity, inflammation, and neurotransmission.

B) Ceramide (CER) species are biosynthesised via the enzyme serine palmitoyltransferase (*SPTLC1-3*) that converts palmitoyl-CoA and L-serine to 3-keto dihydrosphingosine, in the rate-limiting step of the sphingolipid *de novo* pathway. The resulting dihydrosphingosine (C18DS) is coupled to various fatty acids via ceramide synthases (CERS) to generate dihydroceramides [CER[NDS]] that are further converted to CER[NS] via the enzyme delta 4-desaturase (*DEGSI*). Conversion of these pro-apoptotic CER[NS] species to sphingosine (C18S) and sphingosine 1-phosphate (C18S1P), with roles in cell survival, degrades ceramides through reversible reactions. CER[NS] are also reversibly converted to sphingomyelin (SM) or further metabolised to ceramide 1-phosphate [C1P]). In a similar way, addition of alpha-hydroxy fatty acids to C18DS, results in CER[ADS] species.

Measured lipid species are in bold; genes encoding enzymes are in italics; genes identified through SNPs that associated at GWAS with circulating lipid levels are in red.

### Figure 2: Heritability estimates of *N*-acyl ethanolamines and ceramides found in human plasma.

This figure depicts the heritability estimated for each lipid species using SNP-based GCTA software (y-axis) and reported pedigree-based QTDT software (x-axis). This data is presented in detail in Table S5.

### Figure 3: Family-based GWAS results for *N*-acyl ethanolamines and the lead SNP in fatty acid amide hydrolase (*FAAH*).

The radar plot depicts the P-value for association between the lead SNP and eQTL of *FAAH* (rs324420) and each NAE species. The P-values were grouped into “ $<5 \times 10^{-8}$ ” ( $P < 5 \times 10^{-8}$ , outermost ring), “ $\times 10^{-6}$ ” ( $P = 5.0 \times 10^{-8} - 9.9 \times 10^{-6}$  [of which there are no NAE species]), “ $\times 10^{-5}$ ” ( $1.0 \times 10^{-5} - 9.9 \times 10^{-5}$ ), and “NS” (not significant) at the center of the radar.

### Figure 4: LocusZoom plot of the association of PEA with *FAAH* SNP rs324420

The LocusZoom plot depicts the association of *N*-acyl ethanolamine lipid species PEA with *FAAH* SNP rs324420 on chromosome 1. The  $r^2$  for each SNP is depicted in colour. The plot was created using the LocusZoom plot tools at <http://locuszoom.sph.umich.edu/>.

### Figure 5: Family-based GWAS results for CER[NS] and precursor CER[NDS] with an exemplar SNP in serine palmitoyltransferase (*SPTLC3*).

The radar plot depicts the P-value for association between the lead SNP and liver eQTL of *SPTLC3* (rs680379) with CER species. The P-values were grouped into “ $<5 \times 10^{-8}$ ” ( $P < 5 \times 10^{-8}$ , outermost ring), “ $\times 10^{-6}$ ” ( $P = 5.0 \times 10^{-8} - 9.9 \times 10^{-6}$ ), “ $\times 10^{-5}$ ” ( $1.0 \times 10^{-5} - 9.9 \times 10^{-5}$ ), and “NS” (not significant) at the center of the radar.

### Figure 6: LocusZoom plot of the association of CER[N(24)S(19)] with *SPTLC3* SNP rs680379

The LocusZoom plot depicts the association of CER[N(24)S(19)] with *FAAH* SNP rs680379 on chromosome 1. While there is a group of lead SNPs, this SNP was depicted as it has been identified previously to associate at GWAS with sphingolipid species. The  $r^2$  for each SNP is depicted in colour. The plot was created using the LocusZoom plot tools at <http://locuszoom.sph.umich.edu/>.

## Tables

**Table 1: Summary statistics for the study participants.**

Data is shown as mean and standard deviation (SD) unless otherwise indicated; BMI, body mass index; WHR, waist-hip ratio.

| Trait                | Mean (SD)    |
|----------------------|--------------|
| Gender               | 47% Male     |
| Hypertensive         | 33%          |
| Mean Blood Pressure  | 138/83 mmHg  |
| Age (years)          | 49 (15)      |
| BMI                  | 26.04 (4.33) |
| WHR                  | 0.86 (0.09)  |
| Cholesterol (mmol/L) | 5.61 (1.20)  |

**A**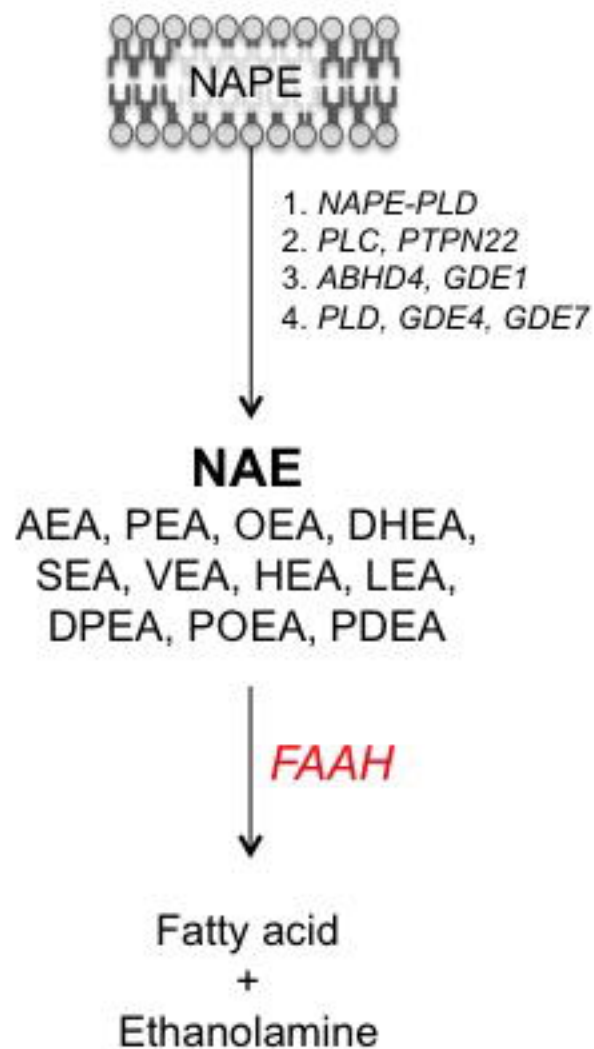**B**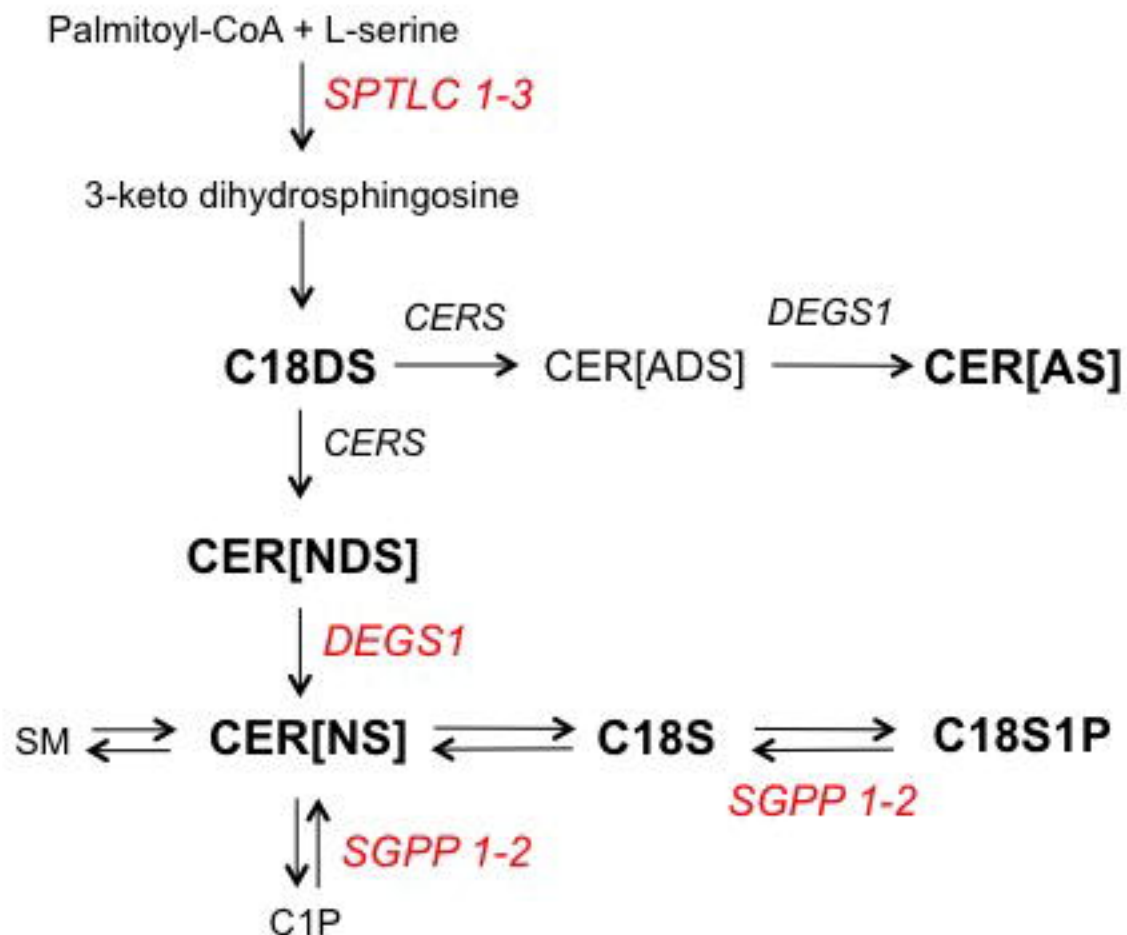



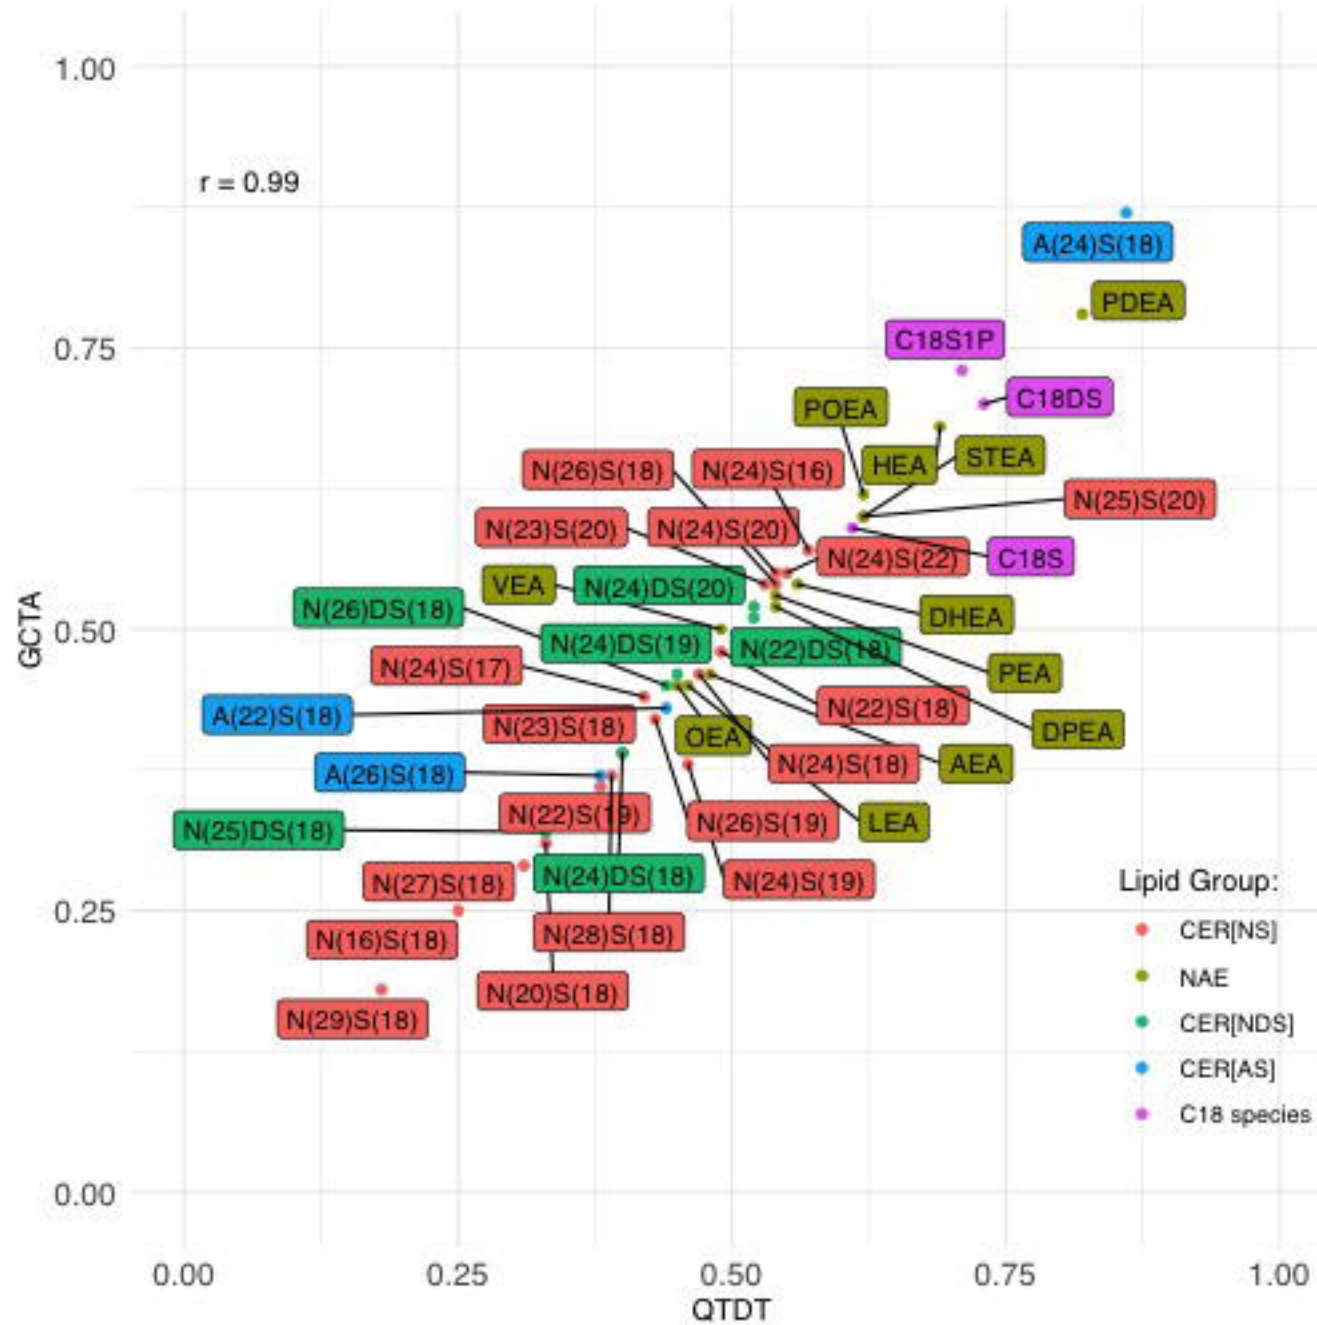

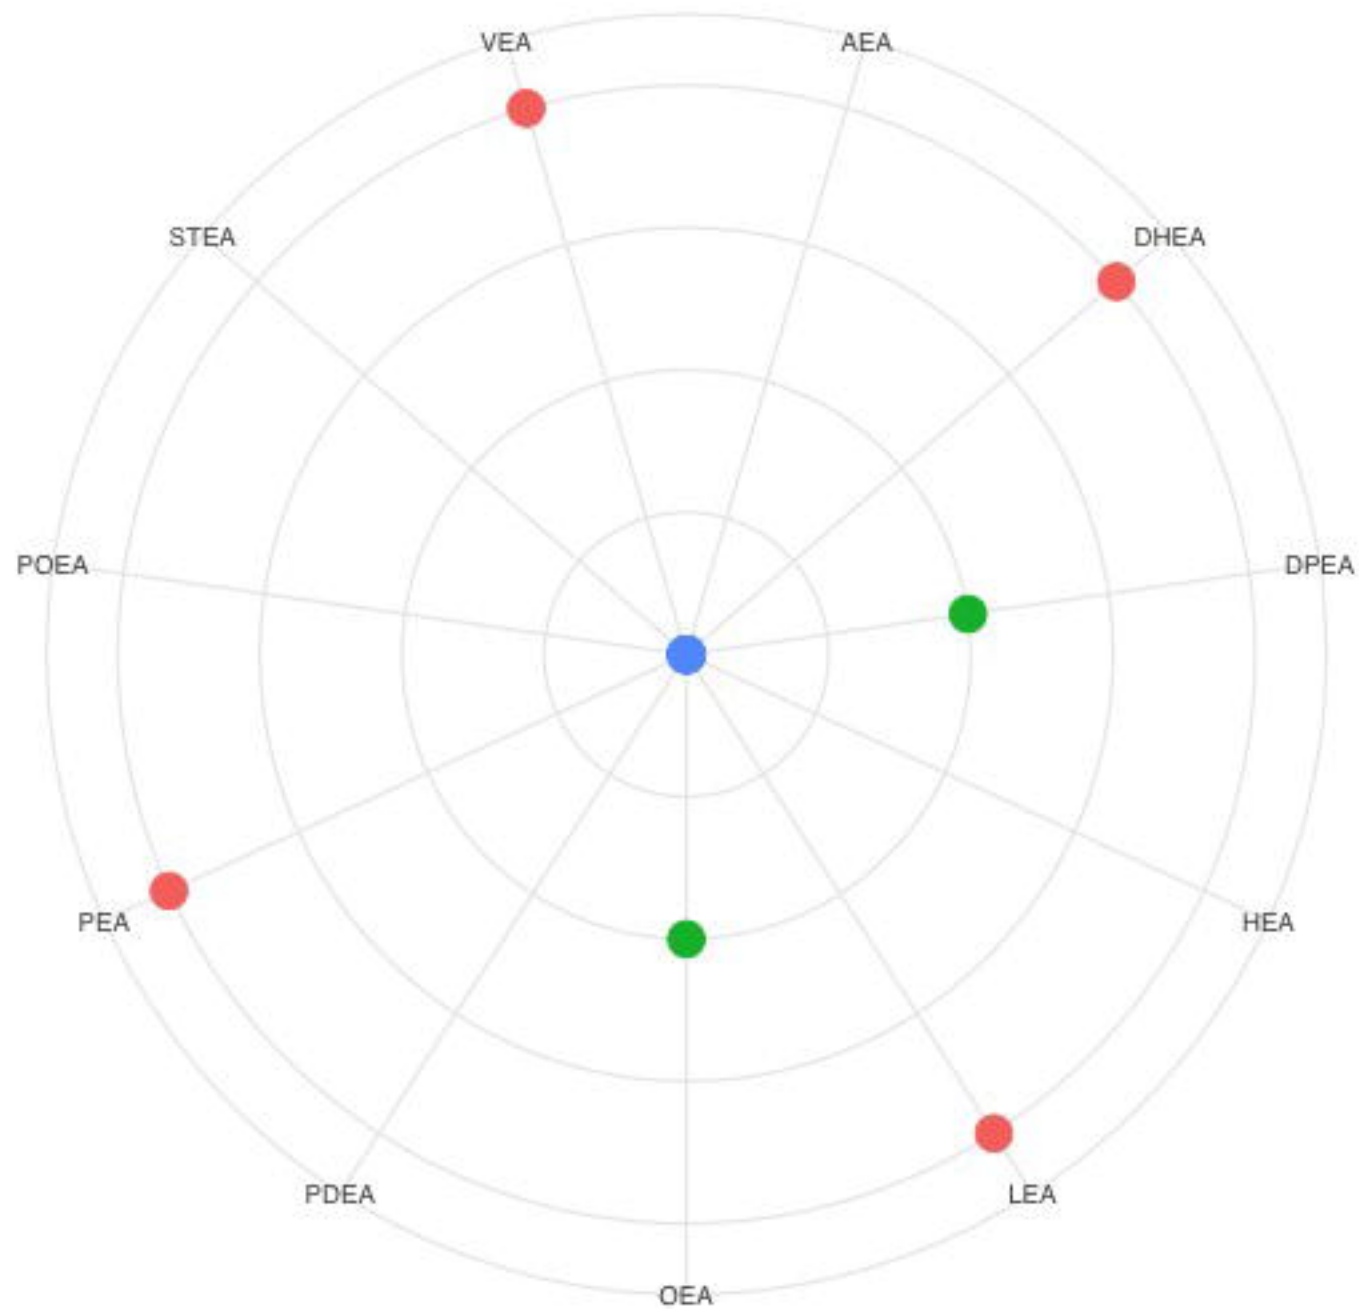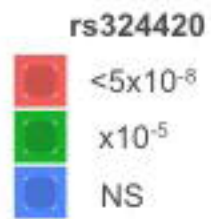

Plotted SNPs

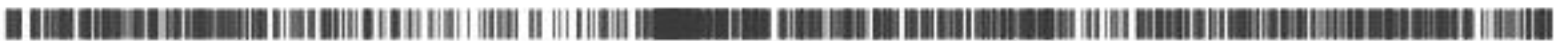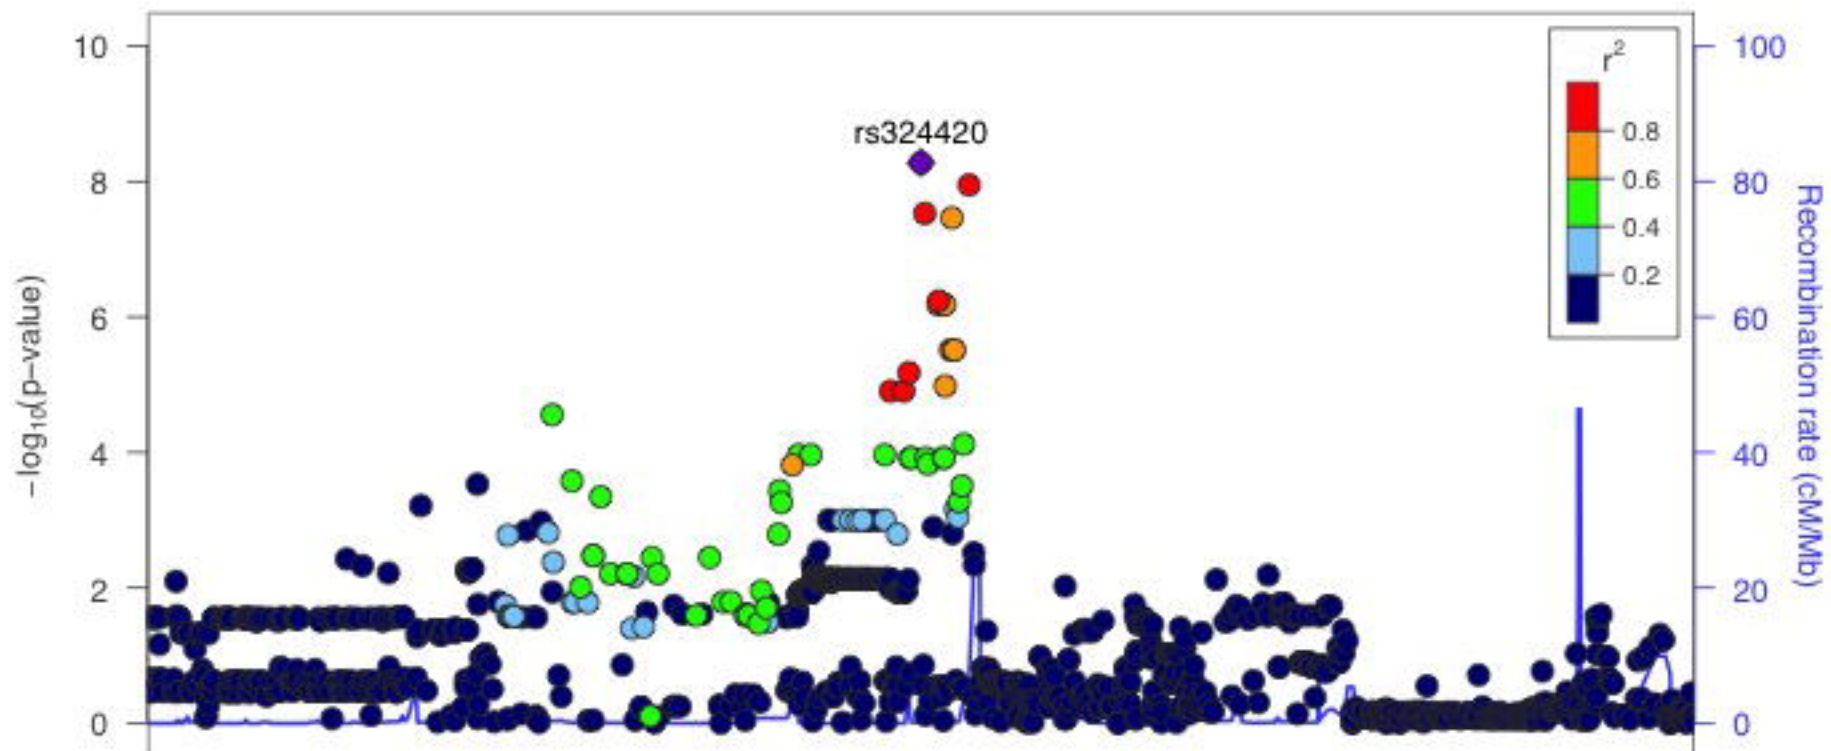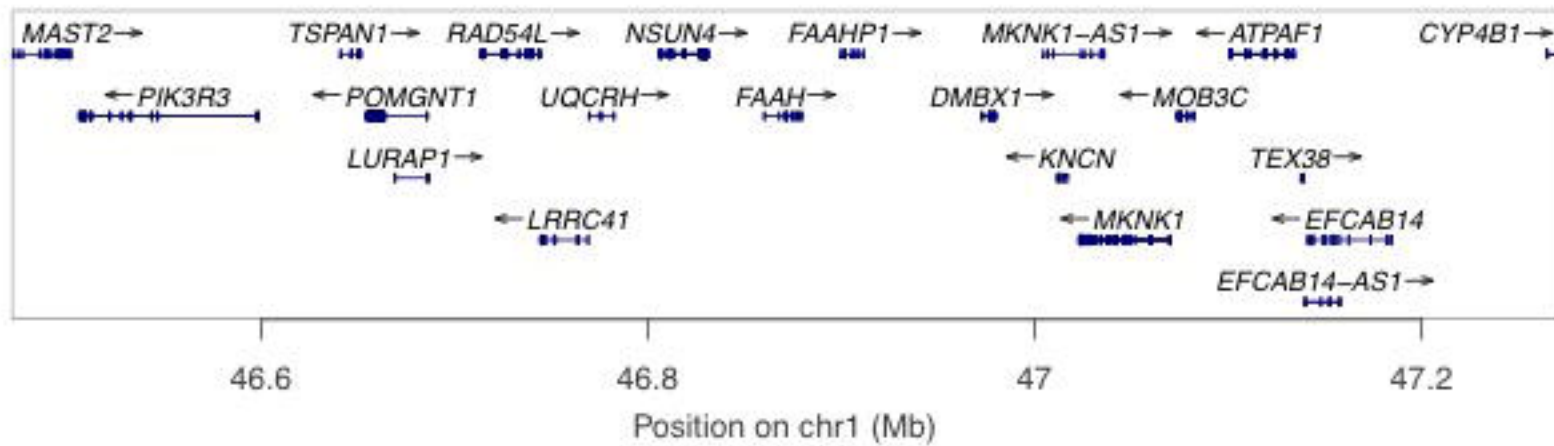

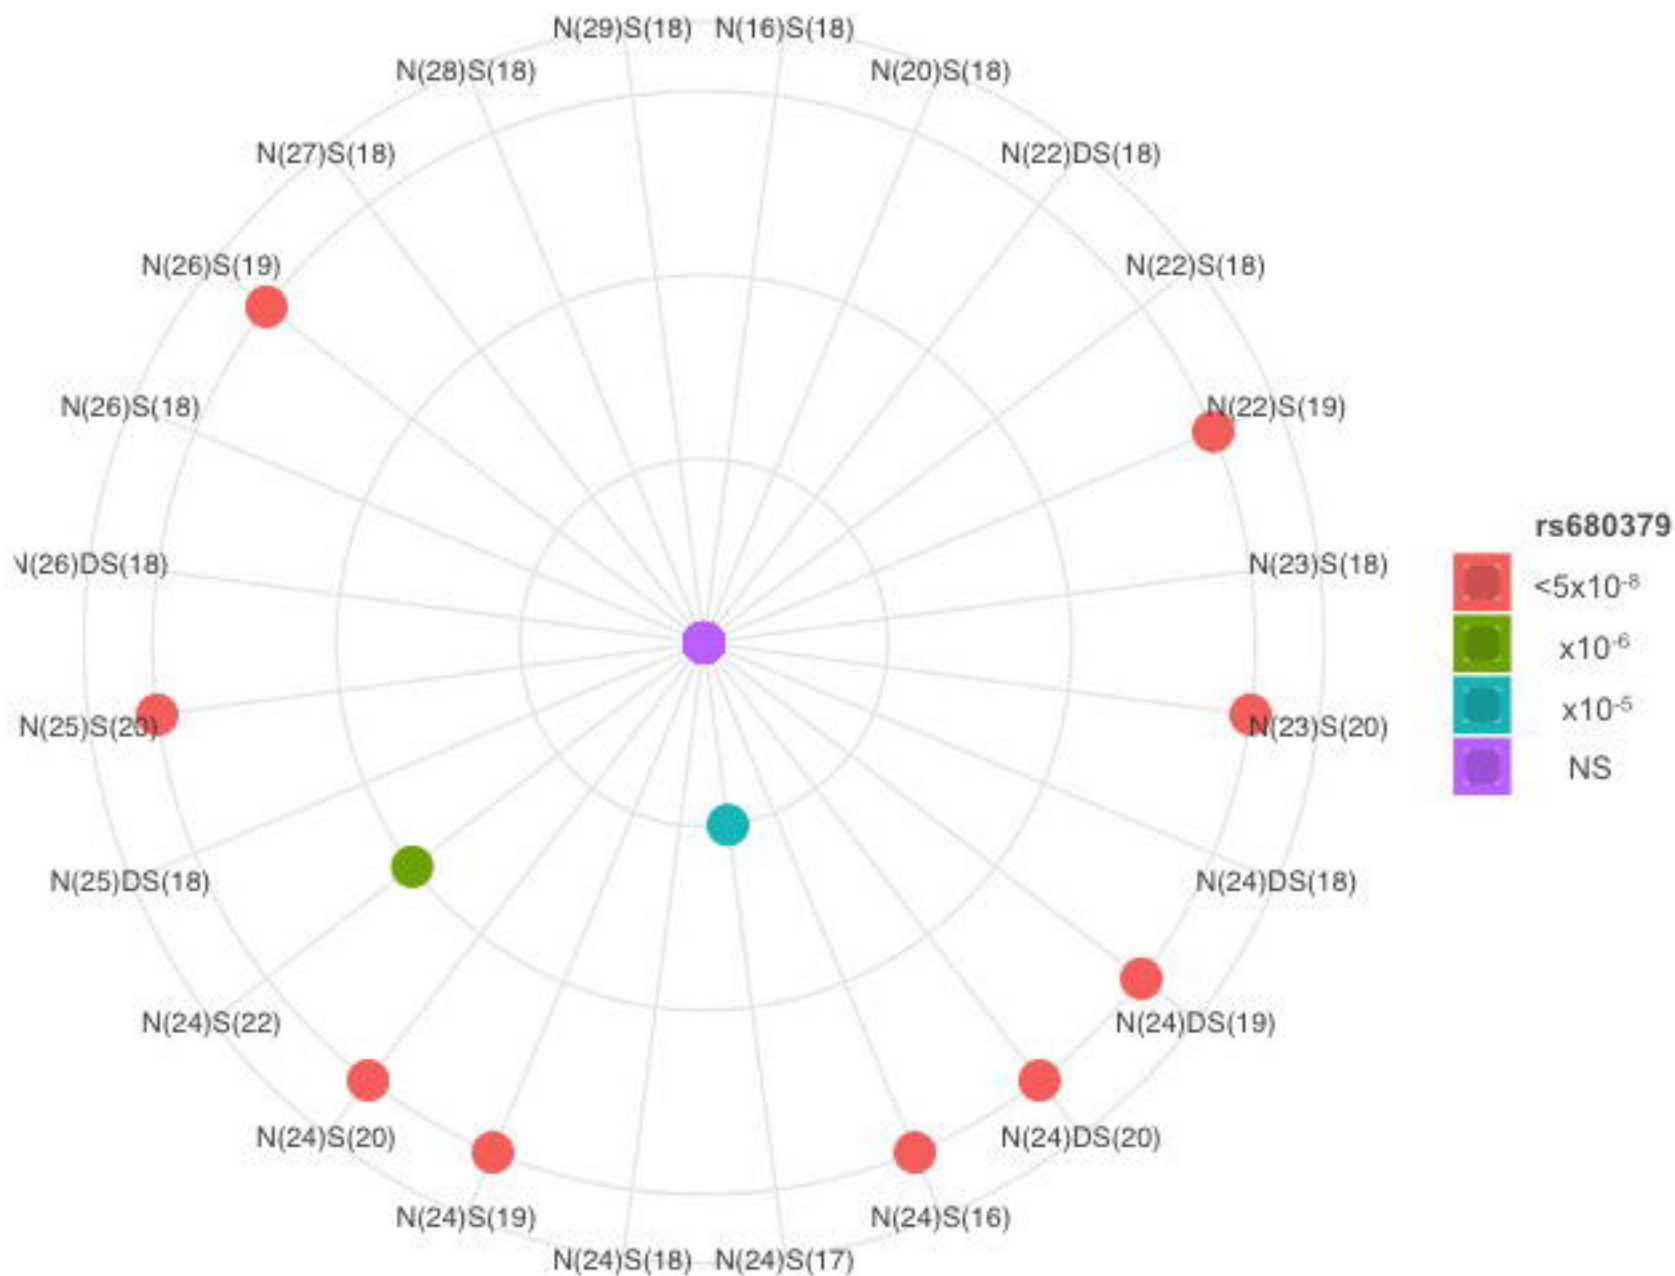

Plotted SNPs

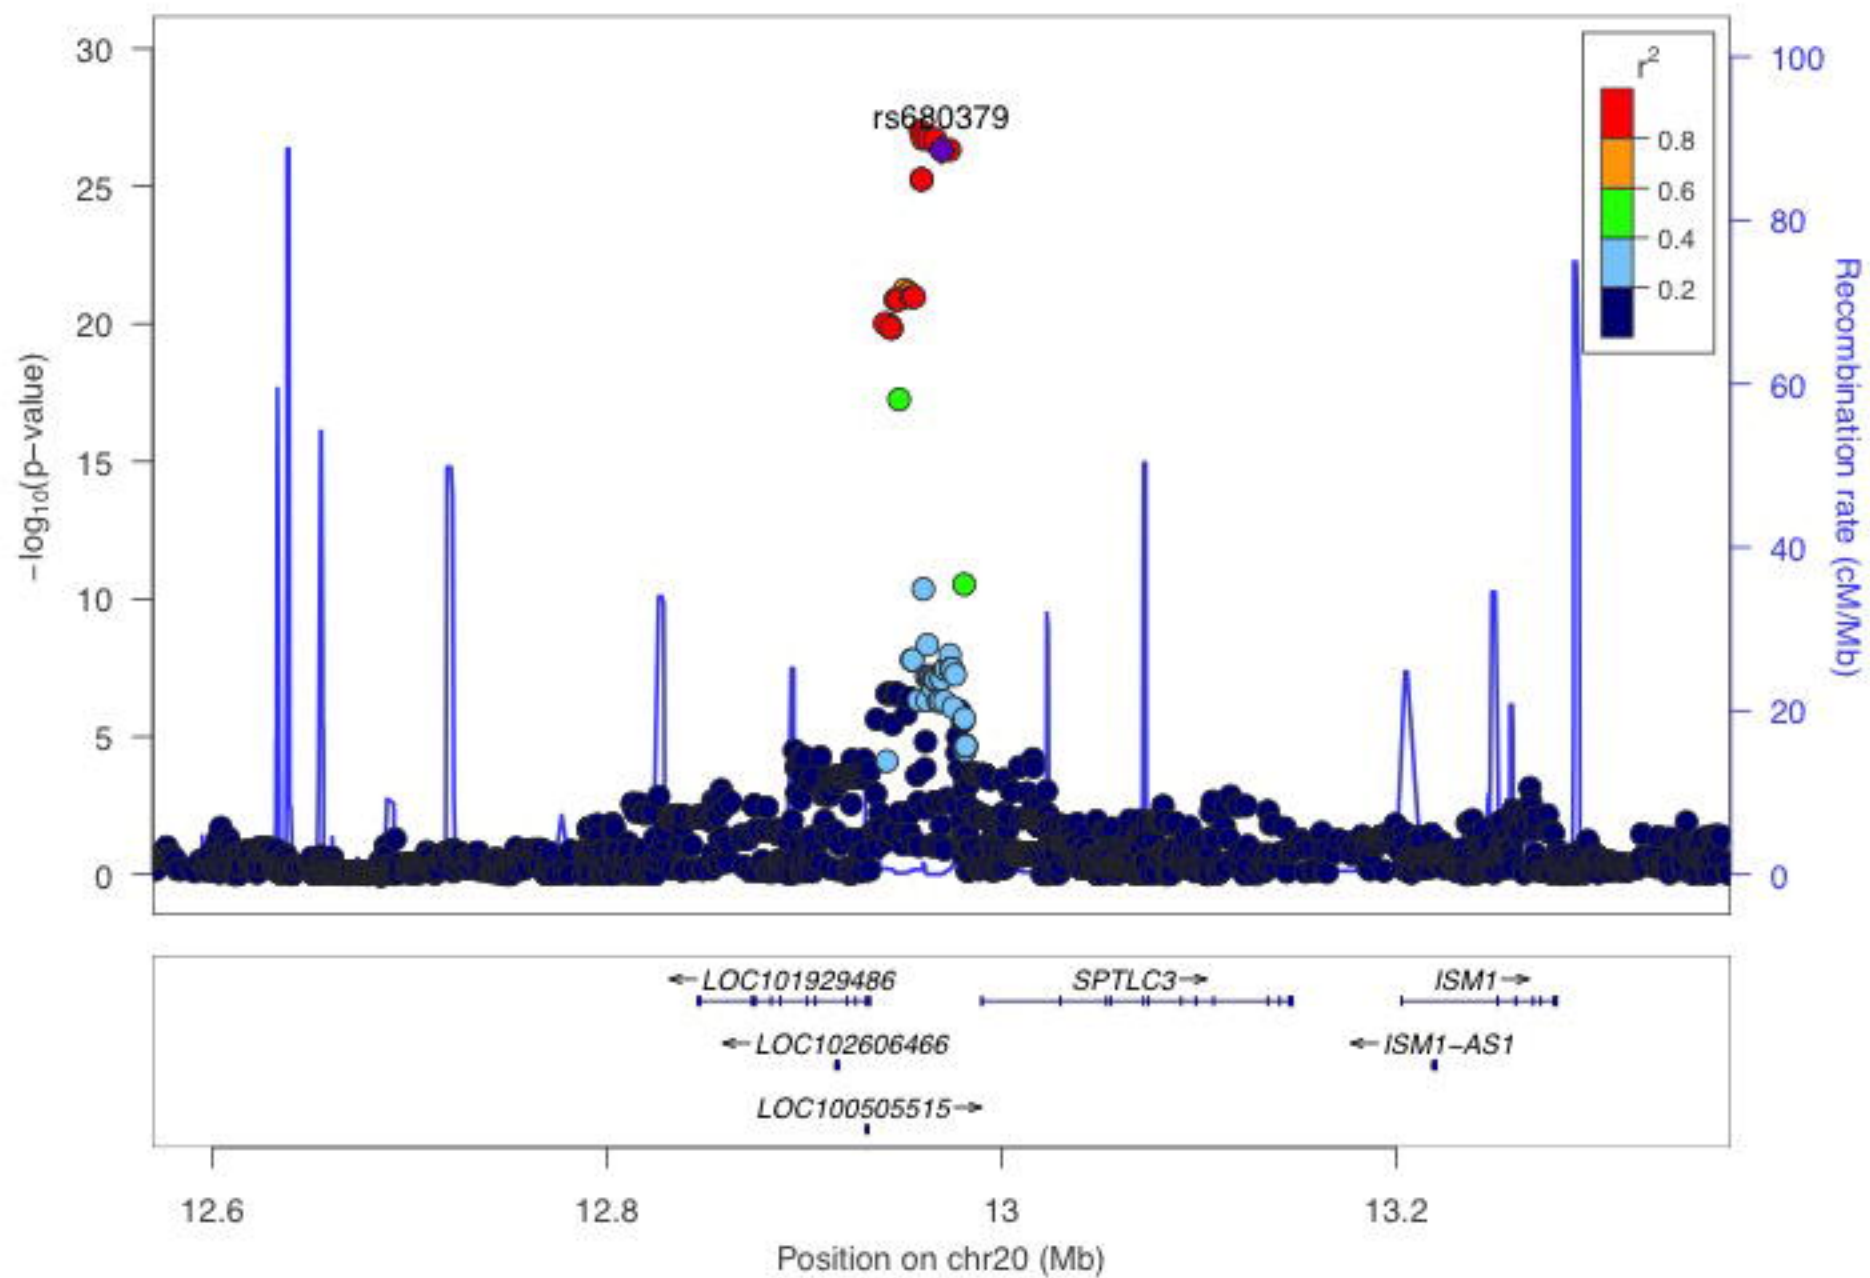

Source: http://biorxiv.org/content/10.1101/815654v1.full.pdf
