1 **Heritability and family-based GWAS analyses**  
2 **of the *N*-acyl ethanolamine and ceramide plasma lipidome**

3  
4 Kathryn A. McGurk<sup>1,2,3</sup>, Simon G. Williams<sup>1</sup>, Hui Guo<sup>4</sup>, Hugh Watkins<sup>5,6</sup>, Martin Farrall<sup>5,6</sup>, Heather J.  
5 Cordell<sup>7</sup>, Anna Nicolaou<sup>2,†</sup>, Bernard D. Keavney<sup>1,8, †,\*</sup>

6  
7 <sup>1</sup>Division of Cardiovascular Sciences, Faculty of Biology, Medicine and Health, Manchester  
8 Academic Health Science Centre, University of Manchester, Manchester, UK

9 <sup>2</sup>Laboratory for Lipidomics and Lipid Biology, Division of Pharmacy and Optometry, Faculty of  
10 Biology, Medicine and Health, Manchester Academic Health Science Centre, University of  
11 Manchester, Manchester, UK

12 <sup>3</sup>Current address: National Heart and Lung Institute, Faculty of Medicine, Imperial College London,  
13 UK

14 <sup>4</sup>Division of Population Health, Health Services Research & Primary Care, Faculty of Biology,  
15 Medicine and Health, Manchester Academic Health Science Centre, University of Manchester, UK

16 <sup>5</sup>Division of Cardiovascular Medicine, Radcliffe Department of Medicine, University of Oxford,  
17 Oxford, UK

18 <sup>6</sup>Wellcome Centre for Human Genetics, University of Oxford, Oxford, UK

19 <sup>7</sup>Population Health Sciences Institute, Faculty of Medical Sciences, Newcastle University, Newcastle  
20 upon Tyne, UK

21 <sup>8</sup>Manchester Heart Centre, Manchester University NHS Foundation Trust, UK

22 <sup>†</sup>These authors contributed equally to this work

23

24

25

26

27

28

29

30 **\*To whom correspondence should be addressed**

31 Bernard D. Keavney, AV Hill Building, University of Manchester, Manchester M13 9NT

32 T: +44 161 275 1225, F: +44 161 275 1183, E: [bernard.keavney@manchester.ac.uk](mailto:bernard.keavney@manchester.ac.uk)

33 **Abstract**

34

35 Signalling lipids of the *N*-acyl ethanolamine (NAE) and ceramide (CER) classes are emerging as  
36 novel cardiovascular disease biomarkers. We sought to establish the heritability of plasma NAEs  
37 (including the endocannabinoid anandamide) and CERs, and identify common DNA variants  
38 influencing the circulating concentrations of the heritable lipid species. Nine NAE and sixteen CER  
39 species were analysed in plasma samples from 999 members of 196 British Caucasian families, using  
40 targeted mass spectrometry (UPLC-MS/MS). Heritability was estimated and GWAS analyses were  
41 undertaken; all target lipids were significantly heritable ( $h^2 = 36\%-62\%$ ). A missense variant  
42 (rs324420) in the gene encoding the enzyme fatty acid amide hydrolase (*FAAH*), which degrades  
43 NAEs, associated at GWAS significance ( $P < 2.15 \times 10^{-8}$ ) with four NAEs (DHEA, PEA, LEA, VEA).  
44 The A allele of this SNP was associated with a 0.23 SD per-allele increase in plasma NAE species.  
45 Additionally, we found association between rs680379 in the *SPTLC3* gene, which encodes a subunit  
46 of the rate limiting enzyme in CER biosynthesis, and a range of CER species (e.g. CER[N(24)S(19)];  
47  $P = 4.82 \times 10^{-27}$ ). We also observed three novel associations (*CD83*, *SGPPI*, *FBXO28-DEGSI*)  
48 influencing plasma CER traits, two of which (*SGPPI* and *DEGSI*) implicate CER species in  
49 haematological phenotypes. NAE and CER are substantially heritable bioactive lipids, influenced by  
50 SNPs in key metabolic enzymes.

51

## 52 **1. Introduction**

53

54 Genetic studies in large numbers of individuals have identified loci where common genetic variation  
55 influences the prevalence of the major plasma lipid species, such as HDL- and LDL-cholesterol, and  
56 triglycerides (1,2). Recent advances in targeted lipidomics have enabled quantitative analyses of a  
57 greater proportion of the mediator lipidome in blood, supporting attempts to identify genetic  
58 associations for low-concentration bioactive lipid species to potentially find cardiovascular disease  
59 biomarkers.

60

61 Bioactive lipids of the *N*-acyl ethanolamine (NAE) and ceramide (CER) classes have potent roles in  
62 inflammation and immunity (3–5). NAEs are fatty acid derivatives, derived from membrane  
63 phospholipids and degraded by the enzyme fatty acid amide hydrolase (*FAAH*; Figure 1). This class  
64 of bioactive lipids includes the endocannabinoid anandamide (AEA), the nuclear factor agonist  
65 palmitoyl ethanolamide (PEA), and a number of other species with roles in neuronal signalling, pain  
66 and obesity (6–9). The contribution of genetic factors to the blood levels of NAEs has only been  
67 studied for one NAE species, oleoyl ethanolamide (OEA), in a study using untargeted mass  
68 spectrometry (10).

69

70 Ceramides are members of the sphingolipid class, being derivatives of sphingoid bases (e.g.  
71 sphingosine and dihydrosphingosine) and fatty acids (Figure 1). The first and rate limiting step (11) of  
72 their *de novo* biosynthesis is catalysed by the enzyme serine palmitoyltransferase, a heterodimeric  
73 protein whose monomers are encoded by the *SPTLC1-3* genes. Ceramides play important roles in  
74 apoptosis (12). Recently, some circulating ceramide derivatives of 18-carbon sphingosine and non-  
75 hydroxy fatty acids (e.g. CER[N(16)S(18)]) have been suggested as novel biomarkers of  
76 cardiovascular death (13), type-2 diabetes, and insulin resistance (14). Furthermore, the contribution  
77 of genetic factors to these ceramides species has also been investigated (15–18).

78

79 In this study we analysed plasma NAEs and ceramides by mass spectrometry-based targeted  
80 quantitative lipidomics in 196 British Caucasian families comprising 999 individuals, and then  
81 investigated the heritability and common genetic variant associations. We show that these bioactive  
82 lipid mediators are substantially heritable, and demonstrate that plasma NAEs and a wide range of  
83 ceramides are influenced by SNPs in key metabolic enzymes (*FAAH*, *SPTLC3*, *DEGSI*, *SGPPI*).  
84 Furthermore, we identify a novel inflammatory locus (*CD83*) associated with ceramide species, and  
85 implicate this group of bioactive lipid mediators in haematological phenotypes through Mendelian  
86 randomisation, using SNPs in *DEGSI* and *SGPPI* as instruments.  
87

## 88 2. Results

89

### 90 2.1 Population characteristics

91 Plasma samples of 999 participants from 196 British Caucasian families were included in the genetic  
92 analyses. The families consisted of 1-24 members (mean of 5 members) with plasma available for  
93 lipidomics analyses (Figure S2). Participant descriptions are listed in Table 1.

94

### 95 2.2 Lipidomics descriptive statistics

96 Of the nine NAE species identified in plasma, palmitoyl ethanolamide (PEA) was at highest  
97 abundance ( $1.89 \pm 1.36$  ng/ml [mean  $\pm$  SD]), and of the sixteen plasma ceramide species,  
98 CER[N(24)S(18)] was most abundant ( $2.72 \pm 1.29$  nmol/ml), similar to previous studies (19–23).

99

100

### 101 2.3 Signalling lipid species are highly heritable

102 The signalling lipid species studied in this project were estimated to be substantially heritable (Figure  
103 2, Table S8). The NAE species had estimated heritabilities ranging from 45% to 56% ( $P_{\text{adj}} < 4.28 \times 10^{-15}$ ), with *N*-docosahexaenoyl ethanolamine (DHEA) producing the highest estimated heritability.

105 The ceramide species had estimated heritabilities ranging from 36% to 62% ( $P_{\text{adj}} < 4.40 \times 10^{-13}$ ), with  
106 CER[N(25)S(20)] and CER[N(24)S(16)] producing the highest estimated heritability.

107

### 108 2.4 Genome-wide association study of *N*-acyl ethanolamines

109 There were conventionally GWAS significant ( $P < 5 \times 10^{-8}$ ) associations between four NAEs (*N*-  
110 docosahexaenoyl ethanolamide, DHEA; *N*-linoleoyl ethanolamide, LEA; *N*-palmitoyl ethanolamide  
111 PEA; *N*-vaccinoyl ethanolamide, VEA), as well as the sum of all NAEs (sumNAE), with SNPs in the  
112 gene encoding fatty acid amide hydrolase (*FAAH*), which catalyses the degradation of NAEs (Figure  
113 1, Table S9, Figure S3). The leading SNP is a missense variant (rs324420; C385A; P129T) and eQTL  
114 of *FAAH* in multiple tissues including whole blood. Presence of the missense variant causes the  
115 enzyme to display normal catalytic properties but decreased cellular stability (24) by enhanced  
116 sensitivity of the enzyme to proteolytic degradation (19). The magnitude of the genetic effect was

117 considerable (Figure 3); the A allele of the lead SNP rs324420 caused a 0.23 SD per-allele increase in  
118 the plasma NAE species.

119

### 120 *2.5 Genome-wide association study of ceramides and related sphingolipids*

121 Seven CER[NS] and two CER[NDS] species were significantly associated with SNPs in an intergenic  
122 region on chromosome 20 (Figure 4, with example Manhattan plot depicted in Figure S4, and further  
123 details in Table S11). Assessing the SNPs using GTEx confirmed them as liver eQTLs (Table S11)  
124 found 20,000 bases downstream of the gene encoding the third subunit of serine palmitoyltransferase  
125 (*SPTLC3*; Figure 6), which catalyses the rate-limiting step (11) of CER biosynthesis (Figure 1). The  
126 SNPs are associated with differences in the expression of the *SPTLC3* gene in the liver. Associated  
127 SNPs had considerable phenotypic effects, for example the A allele of the SNP rs680379 was  
128 associated with a 0.30 SD per-allele increase in plasma ceramides. Furthermore, the summed total of  
129 all ceramide species with 24-carbon non-hydroxy fatty acids, and, independently, those with 19- and  
130 20-carbon sphingosine bases, were found associated with the same SNPs at the *SPTLC3* locus (Table  
131 S11). A novel association was identified for CER[N(26)S(19)] at a locus on chromosome 6, upstream  
132 to the gene for inflammatory protein CD83 (e.g. rs6940658,  $P=2.07 \times 10^{-8}$ ; depicted in Figure S5, with  
133 further details in Table S11).

134

### 135 *2.6 Association of ceramides and related traits with hematological phenotypes*

136 The Gene Atlas Browser of PheWAS in the UK Biobank study was used to assess the association of  
137 significant SNPs identified here with the extensive number of phenotypes measured for the UK  
138 Biobank cohort. The ratio of CER[N(24)S(19)] to its biochemical precursor CER[N(24)DS(19)], is  
139 indicative of delta 4-desaturase, sphingolipid 1 (*DEGSI*) activity (Figure 1). A set of SNPs in the  
140 upstream region of the *DEGSI* gene on chromosome 1 associated with this ratio ( $P=4.34 \times 10^{-8}$ ; Figure  
141 S6, Table S10). All significant SNPs were confirmed eQTLs of *DEGSI* in whole blood (Table S11).  
142 This locus associated with numerous blood cell phenotypes in the UKBiobank data (e.g. rs4653568  
143 and mean platelet volume;  $P=4.77 \times 10^{-12}$ ; Table S11).

144

145 The GWAS results for species CER[N(24)S(16)] showed an association with the *SPTLC3* region and  
146 also with a further set of SNPs upstream of the gene encoding sphingosine-1 phosphate phosphatase  
147 (*SGPPI*) (e.g. rs7160525,  $P=5.67 \times 10^{-10}$ ; Figure S7). This enzyme is involved in the recycling of  
148 CER[NS] species from sphingosine and sphingosine-1-phosphate (Figure 1). All significant SNPs at  
149 this locus were also associated with blood cell phenotypes, identified in the UK Biobank data (e.g.  
150 rs7160525 and mean platelet volume,  $P=3.28 \times 10^{-29}$ ; Table S11).

151

152 The significant SNPs identified at *SGPPI*, *DEGSI*, and *SPTLC3* genomic loci were used as  
153 instruments for two-sample Mendelian randomisation analyses (2SMR) using published blood cell  
154 count GWAS as outcome variables (25). The SNPs in *SGPPI* that associated with CER[N(24)S(16)]  
155 were significant ( $P_{\text{adj}} < 0.05$ ) in influencing platelet, red blood cell, and white blood cell traits (Table  
156 S12). 2SMR analyses using the significant SNPs identified for *SPTLC3*, *FAAH*, *SGPPI*, and *DEGSI*  
157 as genetic instruments, did not suggest a causal role of the lipid species for which we detected GWAS  
158 significant association, in CVD (26). Neither did we find evidence for a causal association of the  
159 ceramide species measured here with type 2 diabetes using associated SNPs in *SPTLC3* (27).

160

161 **3. Discussion**

162

163 We show substantial heritability estimated for an array of signalling lipid mediators found in plasma  
164 and we identify GWAS significant associations between lipid species and DNA variants of the  
165 enzymes in their respective metabolic pathways. We have provided the first GWAS significant  
166 evidence of association between SNPs in the *FAAH* gene and four plasma NAEs (DHEA, LEA, PEA,  
167 and VEA). Additionally, we have extended the previously described association between SNPs in the  
168 *SPTLC3* gene and plasma ceramides to a wider range of species. Our results indicate that these two  
169 genes are the major loci influencing plasma levels of NAEs and CERs, respectively. In addition, we  
170 have shown novel SNP associations (*CD83*, *SGPPI*, *DEGS1*) influencing plasma ceramides species,  
171 that implicate ceramides in haematological phenotypes.

172

173 The NAE species DHEA, LEA, PEA, and VEA, associated with the SNP rs680379, a missense  
174 change in the NAE degradation enzyme *FAAH*. The association with PEA was identified previously  
175 in a single candidate gene study of mutations in *FAAH* in 114 subjects (28), which reported the same  
176 direction of effect on plasma AEA, PEA, and OEA species but with P-values insignificant at genome-  
177 wide levels ( $0.003 < P < 0.04$ ). OEA is the only NAE species that has been previously associated with  
178 DNA variants at GWAS significance. An eQTL of *FAAH* (rs1571138, upstream to *FAAHPI*,  
179  $P = 5.15 \times 10^{-23}$ ) that is in complete linkage disequilibrium with the lead SNP in our study, was  
180 identified in an untargeted study of blood lipids; OEA was the only NAE species measured in that  
181 study (10). Here, we found only a suggestive association with OEA ( $P = 5.80 \times 10^{-5}$ ), although we  
182 observed non-significant trends in the same direction for all NAE species with genotype at this SNP  
183 (Figure 3).

184

185 While the *FAAH* missense SNP rs324420 is not associated with any disease endpoints identified from  
186 GWAS to date, the A allele, associated with higher NAE levels, has been reported to increase the risk  
187 of polysubstance addiction and abuse [MIM: 606581] in three candidate gene studies totaling 863  
188 cases and 2,170 controls (19,29,30). PheWAS analysis using the Gene Atlas UK Biobank online



189 browser however, did not identify significant association in a similar number of UK Biobank cases of  
190 substance abuse/dependency (OR for A allele = 1.10; P = 0.14; 746 cases and 451,518 controls). It is  
191 possible that misclassification bias has affected the UK Biobank PheWAS; among the 451,518 UK  
192 Biobank participants assigned as controls, some reported dependencies on other substances and  
193 behaviours, such as coffee, cigarettes, prescription drugs, and gambling [UKBiobank data show case;  
194 <http://biobank.ndph.ox.ac.uk/showcase/>, accessed April 2019]. The potential implication of NAE  
195 species in addiction through the association with the *FAAH* SNP, warrants further investigation in  
196 larger numbers of cases.

197

198 As direct cannabinoid receptor 1 antagonist drugs have caused severe adverse psychiatric effects (31),  
199 *FAAH* inhibitors are being evaluated as an alternative approach to modulating endocannabinoid  
200 signalling (32,33). However, In 2016, a *FAAH* inhibitor resulted in severe neurological side-effects in  
201 a Phase I trial; this was hypothesised due to off-target drug effects rather than adverse on-target  
202 effects (34). As the functional *FAAH* SNP rs324420, which substantially impacts *FAAH* activity, did  
203 not associate with any adverse phenotypes in the UK Biobank, it is likely that on-target effects of  
204 *FAAH* inhibitors do not have substantial risks of causing conditions that occurred with appreciable  
205 frequency in UK Biobank.

206

207 Narrow-sense heritability has been estimated for ceramides in previous studies, showing estimated  
208 heritability of 9% to 51% (17,18). Here, we assess a different array of species and expand on these  
209 previous estimates to show that further CER[NS] and CER[NDS] are significantly heritable. The  
210 rs7157785 variant in sphingosine 1-phosphate phosphatase 1 (*SGPPI*), a ceramide metabolic enzyme,  
211 has been identified previously in GWAS of sphingomyelin (15,16,35), total cholesterol (36),  
212 glycerophospholipids (35), and the ratio of an unknown blood lipid (X-08402) to cholesterol (37). The  
213 novel association with CER[N(24)S(16)] we describe is consistent with the enzyme's role in  
214 influencing CER[NS] production, through the formation of sphingosine (C18S) for CER[NS]  
215 biosynthesis (Figure 1). The other significant SNPs identified at the same locus and in linkage  
216 disequilibrium with the lead SNP, associated with this ceramide species and have been previously

217 identified in further GWAS studies of blood phospholipids (38), red cell distribution width (25),  
218 sphingomyelin (38), and unknown blood metabolite X-10510 (37). All SNPs identified at this locus  
219 associated in the UKBiobank PheWAS assessment with multiple blood cell counts and other  
220 hematological phenotypes. Ceramides have been previously shown to stimulate erythrocyte formation  
221 through platelet activating factor (39). However, further studies will be required to identify the  
222 mechanism of the association between genetically determined plasma ceramide levels and blood cell  
223 phenotypes.

224

225 CER[N(26)S(19)] associated at GWAS significance with SNPs at a novel locus on chromosome 6,  
226 upstream to the gene encoding the inflammatory protein CD83 ( $P=2.07 \times 10^{-8}$ ), a member of the  
227 immunoglobulin superfamily of membrane receptors expressed by antigen-presenting white blood  
228 cells, leukocytes, and dendritic cells (40). An interaction between CD83 and ceramides is currently  
229 unknown, but given the involvement of ceramide signalling in inflammation and immunity (41,42), it  
230 would be of interest to investigate further.

231

232 Association between some ceramide species and the *SPTLC3* SNP rs680379 has been identified  
233 previously through the use of shotgun lipidomics for four ceramide species (CER[N(22)S(18)],  
234 CER[N(23)S(18)], CER[N(24)S(18)], and CER[N(24:1)S(18)]) at GWAS significance (15,16). Here,  
235 we identify associations between an additional seven CER[NS] and two CER[NDS] plasma species  
236 and this SNP, and with other eQTLs of serine palmitoyltransferase at the same locus; as this enzyme  
237 is the rate limiting step for the *de novo* biosynthesis of ceramides, this association may have wider  
238 implications. While we did not find a significant association with all CER and *SPTLC3* at GWAS, we  
239 observed non-significant trends in the same direction for all ceramide species with genotype at the  
240 rs680379 SNP (Figure 4). The information gathered from the eQTL analysis highlights all of the  
241 *SPTLC3* confirmed eQTLs act in the liver, which is a major site for plasma ceramide biosynthesis.  
242 Neither PheWAS analysis in UK Biobank, nor 2SMR analysis, identified significant disease  
243 associations with the *SPTLC3* locus. A number of CER[NS] species have been studied as potential  
244 biomarkers of cardiovascular disease and diabetes (13,43), and data from others has suggested that the

245 *SPTLC3* locus is associated with these ceramides (15,16). The extent to which specific species have a  
246 role in cardiovascular disease remains debated (44,45).

247

248 A limitation of this study is its size (999 participants), which limits the power to detect small effects;  
249 however, our study is the largest of which we are aware that has analysed this range of plasma NAE  
250 and ceramide species to date. The inclusions of non-fasting samples that are subjectively haemolysed  
251 or contain white blood cells may add noise to the analysis that would impair the detection of weaker  
252 genetic effects. However, this may not be a significant issue as a study on blood ceramide lipidomics  
253 analysis did not find differences between serum and plasma samples, and fasting and non-fasting  
254 samples (46).

255

256 The associations we have uncovered suggest that further investigation of heritable lipid species for  
257 which no GWAS association was found in this study, in larger cohorts and ethnically diverse  
258 populations, would be of interest.

259

## 260 **4. Materials and Methods**

261

### 262 *4.1 Family recruitment*

263 Families were recruited for a quantitative genetic study of hypertension and other cardiovascular risk  
264 factors, and selected via a proband with essential hypertension (secondary hypertension was excluded  
265 using standard clinical criteria) as previously described (47). Probands were recruited from  
266 outpatients attending the John Radcliffe Hospital, Oxford hypertension clinic, or via their family  
267 doctors. Included family members were U.K. residents of self-reported White European ancestry and  
268 were required to consist of 3 or more siblings quantitatively assessable for blood pressure if one  
269 parent of the sibship was available for blood sampling, or 4 or more siblings if no parent was  
270 available. The hypertensive proband could be either in the sibship or parental generation. First, second  
271 and third degree relatives were then recruited to assemble a series of extended families. The  
272 participants were fully phenotyped for blood pressure (using ambulatory monitoring), cardiovascular  
273 risk factors, blood biochemical measures, and anthropometric traits. Non-fasting blood samples were  
274 collected, plasma separated, and stored at -80°C until lipidomic extraction. DNA was extracted from  
275 whole blood by standard methods. The collection protocol obtained ethical clearance from the Central  
276 Oxford Research Ethics Committee (06/Q1605/113) and it corresponds with the principles of the  
277 Declaration of Helsinki. Written informed consent was obtained from all participants. This cohort of  
278 extended families has previously been shown to have adequate power to detect moderate-sized  
279 genetic influences on quantitative traits (48,49).

280

### 281 *4.2 UPLC/ESI-MS/MS mediator lipidomics*

282 Plasma samples were extracted and analysed by mass spectrometry as previously described (50–52).  
283 Briefly, lipids were extracted from plasma (1 mL) using chloroform-methanol in the presence of  
284 internal standards: CER[N(25)S(18)] (50 pmol/sample; Ceramide/Sphingoid Internal Standard  
285 Mixture I, Avanti Polar Lipids, USA) for CER, and AEA-*d*8 (20 ng/sample; Cayman Chemical Co.,  
286 USA) for NAE. Targeted lipidomics was performed on a triple quadrupole mass spectrometer (Xevo  
287 TQS, Waters, UK) with an electrospray ionisation probe coupled to a UPLC pump (Acquity UPLC,

288 Waters, UK). Ceramide species were separated on a C8 column (2.1 x 100 mm) and NAE were  
289 separated on a C18 column (2.1 x 50 mm) (both Acquity UPLC BEH, 1.7 $\mu$ m, Waters, UK). NAE  
290 species were quantified using calibration lines of synthetic standards (Cayman Chemical); relative  
291 quantitation of ceramides was based on the internal standard (Avanti Polar Lipids) (51,53). Thus, the  
292 concentration of plasma NAE species are reported in pg/ml, while the relative abundance of plasma  
293 ceramide species is reported in pmol/ml. Pooled plasma samples from healthy volunteers were used to  
294 create quality control samples that were extracted and analysed blindly alongside the familial samples.  
295 Detailed quality control information can be found in the Supplemental Methods. The CER[NS]  
296 notation (54) denotes a ceramide that contains a non-hydroxy fatty acid attached to a sphingosine  
297 base, for example, a 16-carbon non-hydroxy fatty acid joined to a 18-carbon sphingoid base is  
298 denoted as CER[N(24)S(18)], where N(24) represents a 24-carbon non-hydroxy fatty acid, and S(18)  
299 represents a 18-carbon sphingosine base attached. This species is also denoted as Cer(d18:1/24:0) in  
300 literature.

301

### 302 **4.3 Statistical analysis**

303

#### 304 *4.3.1 Covariate adjustment*

305 Systematic error was considered from a variety of sources and assessed for collinearity; mass  
306 spectrometry batch and a trait created to adjust for sample abnormality (haemolysis or presence of  
307 white blood cells; present in 14% of samples) were included as potential covariates. Ascertainment  
308 selection was modelled via binary hypertension status. The resulting concentrations for each lipid  
309 species from the pooled quality control samples were used for adjustment of systematic errors during  
310 extraction, quantitation, and data processing. The final set of potential covariates included mass  
311 spectrometry batch, sample abnormality, quality control sample measures, age, age<sup>2</sup>, sex,  
312 hypertension status, BMI, and total cholesterol. The lipid measurements were assessed for effect of  
313 potential covariates using stepwise multiple linear regression to identify the best set of predictors,  
314 using the ‘caret’ package and ‘leapSeq’ method in R (version 3.5.2) (see Table S4 for predictors).  
315 Multiple linear regression of the best predictors was undertaken using the ‘lm’ function in R.

316 Residuals from the covariate-adjusted regression models were standardized to have a mean of 0 and a  
317 variance of 1. Outliers were assessed using the R package ‘car’, assessing each observation by testing  
318 them as a mean-shift outlier based on studentized residuals, to remove the most extreme observations  
319 (Bonferroni P-value of  $P < 0.05$ ). Missing values were coded as such in the genetics analyses. As lipid  
320 mediators can exert individual bioactivities, all lipid species were treated uniquely for all analyses,  
321 intra-class correlation analyses are depicted in Figure S1.

322

#### 323 *4.3.2 Genome-wide genotyping quality control*

324 Genotyping was performed using the Illumina 660W-Quad chip on 1,234 individuals (580 males and  
325 654 females) including 248 founders, at 557,124 SNPs. Quality control of the genotyping data was  
326 undertaken using PLINK (55) (version 1.9). No duplicate variants were found. SNPs that were  
327 identified as Mendelian inconsistencies (--mendel-multigen) were marked as missing. Gender checks  
328 assessed by F-statistic (--check-sex) showed that gender as inferred from 538,771 chromosomal SNPs  
329 agreed with reported status. SNPs with low genotyping rates (--geno 0.05), low minor allele  
330 frequency (--maf 0.01), and those that failed checks of Hardy-Weinberg Equilibrium (--hwe 1e-8)  
331 were excluded. Individuals with low genotype rates (--mind 0.05) and outlying heterozygosity were  
332 removed (0.31 - 0.33 included). Relatedness was assessed by high levels of IBD sharing (--genome  
333 and --rel-check) and by visualisation of pairs of individuals’ degree of relatedness (through plotting  
334 the proportion of loci where the pair shares one allele IBD (Z1) by the proportion of loci where the  
335 pair shares zero alleles IBD (Z0)), and two outlier individuals were removed. Ethnicity was assessed  
336 via principal components analysis with genotype data from the 1,000 Genome Project (56), which  
337 confirmed all participants were of European/CEU origin. Following quality control, 503,221  
338 autosomal SNPs from 1,219 individuals (216 families) were available for SNP-based heritability  
339 assessments, of which 999 individuals (196 families; 198 founders and 801 non-founders) had plasma  
340 available for lipidomics.

341

#### 342 *4.3.3 Heritability estimates*

343 SNP-based heritability was estimated using GCTA software (version 1.26.0) (57). A genetic  
344 relationship matrix was created from the quality controlled genotyping data and the --reml command  
345 was used to estimate variance of the traits explained by the genotyped SNPs. A complementary  
346 estimation of pedigree-based heritability was undertaken using the QTDT software (version 2.6.1)  
347 (58), by specifying the -we and -veg options to compare an environmental only variance model with a  
348 polygenic and environmental variances model. The P-values presented are adjusted for multiple  
349 comparisons via Bonferroni correction. The least significant adjusted P-value from the groups of lipid  
350 species described are depicted as  $P_{\text{adj}} < X$ .

351

#### 352 *4.3.4 Genotyping imputation*

353 Following genotyping quality control, 503,221 autosomal SNPs were available to inform imputation.  
354 Imputation was performed through the Michigan Imputation Server (version v1.0.4), specifying pre-  
355 phasing with Eagle (59) (version 2.3) and imputation by Minimac3 (60) using the European  
356 population of the Human Reference Consortium (61) (version hrc.r1.1.2016). Following imputation,  
357 duplicate SNPs and SNPs with  $r^2 < 0.8$  were removed to generate a final set of 10,652,600 SNPs.  
358 Quality control was undertaken for the imputed data on the 999 individuals with lipidomics available,  
359 as follows: SNPs that were identified as Mendelian inconsistencies (--mendel-multigen) were marked  
360 as missing. SNPs with low call rates (--geno 0.05), low minor allele frequency (--maf 0.05), and those  
361 that failed checks of Hardy-Weinberg Equilibrium (--hwe 1e-8) were excluded, resulting in a final  
362 count of 5,280,459 SNPs available for genome-wide association analyses.

363

#### 364 *4.3.5 Family-based genome-wide association studies*

365 Linear mixed modelling approaches were used to account for family structure. Family-based genome-  
366 wide association analyses were undertaken for each lipid trait using GCTA software (version 1.26.0),  
367 specifying mixed linear model association analyses (--mlma). Genomic control inflation factors from  
368 the GWAS analyses can be found in Table S5. The least significant P-values of the significantly  
369 associated SNPs ( $P < 5 \times 10^{-8}$ ) are depicted as  $P < X$  in the manuscript. Significantly associated SNPs  
370 were analysed by Ensembl API Client (version 1.1.5 on GRCh37.p13) to identify neighbouring genes.

371 Further analyses were undertaken of the significantly associated SNPs; expression quantitative trait  
372 loci (eQTL) were identified using the GTEx eQTL Browser (version 8), assessment of previously  
373 identified SNPs from GWAS was undertaken using the GWAS Catalog, review of variants on OMIM,  
374 visualisation of variants using UCSC Genome Browser, and assessment of PheWAS with the UK  
375 Biobank (62) was undertaken using the Gene Atlas Browser.

376

#### 377 *4.3.6 Two-sample Mendelian randomisation analysis*

378 Two sample Mendelian randomisation (2SMR) analysis was undertaken in R following the guidelines  
379 provided by Davey Smith et al [<https://mrcieu.github.io/TwoSampleMR/>] (63). Briefly, selected  
380 examples of the significant associations identified for each class of lipid were analysed by 2SMR for a  
381 number of previously published GWAS of interest. The GWAS significant associations ( $P < 5 \times 10^{-8}$ )  
382 identified for NAE species PEA, and ceramide traits CER[N(22)S(19)], CER[N(24)S(16)], and  
383 CER[N(24)S(19)]/CER[N(24)DS(19)] ratio, were assessed for coronary artery disease (all), Type-2  
384 Diabetes (CER[N(22)S(19)]), and blood cell counts (CER[N(24)S(16)] and  
385 CER[N(24)S(19)]/CER[N(24)DS(19)] ratio). Details on the published GWAS used as outcomes are  
386 presented in Table S6. As many GWAS associated SNPs were in linkage disequilibrium, the  
387 following SNPs remained in the analysis after the data clumping step; rs324420 (*FAAH*; PEA),  
388 rs438568 (*SPTLC3*; CER[N(22)S(19)]), rs7160525 (*SGPPI*; CER[N(24)S(16)]), and rs4653568  
389 (*DEGSI*; CER[N(24)S(19)]/CER[N(24)DS(19)] ratio).



390 **Acknowledgements and funding support**

391

392 We are grateful to the families involved in this study. This work was supported by MRC Doctoral  
393 Award (MR/K501311/1 to K.M.). K.M. is supported by a University of Manchester President's  
394 Doctoral Scholarship. A.N. is supported in part by the NIHR Manchester Biomedical Research  
395 Centre. B.K. is supported by a British Heart Foundation Personal Chair.

396

397 **Conflict of interest statement**

398

399 None declared.

400

401

402 **Author contributions**

403

404 KM: design, analysis and interpretation of data; drafting the article; final approval of the version to be  
405 submitted. SW: analysis of data; revising the article; final approval of the version to be submitted.  
406 HG: analysis of data; revising the article; final approval of the version to be submitted. HW:  
407 acquisition of data; revising the article; final approval of the version to be submitted. MF: analysis  
408 and interpretation of data; revising the article; final approval of the version to be submitted. HC:  
409 analysis and interpretation of data; revising the article; final approval of the version to be submitted.  
410 AN, BK: conception, design, acquisition, and interpretation of data; supervision; revising the article;  
411 final approval of the version to be submitted.

412

413

414 **References**

415

- 416 1. Teslovich, T. M., Musunuru, K., Smith, A. V., et al. (2010) Biological, clinical and population  
417 relevance of 95 loci for blood lipids. *Nature*, **466**, 707–13.
- 418 2. Willer, C. J., Schmidt, E. M., Sengupta, S., et al. (2013) Discovery and refinement of loci  
419 associated with lipid levels. *Nat. Genet.*, **45**, 1274–1285.
- 420 3. MacEyka, M. and Spiegel, S. (2014) Sphingolipid metabolites in inflammatory disease.  
421 *Nature*, **510**, 58–67.
- 422 4. Kendall, A. C. and Nicolaou, A. (2013) Bioactive lipid mediators in skin inflammation and  
423 immunity. *Prog. Lipid Res.*, **52**, 141–164.
- 424 5. Sugamura, K., Sugiyama, S., Nozaki, T., et al. (2009) Activated endocannabinoid system in  
425 coronary artery disease and anti inflammatory effects of cannabinoid 1 receptor blockade on  
426 macrophages. *Circulation*, **119**, 28–36.
- 427 6. Devane, W. A., Hanuš, L., Breuer, A., et al. (1992) Isolation and structure of a brain  
428 constituent that binds to the cannabinoid receptor. *Science (80-. )*, **258**, 1946–1949.
- 429 7. Wilson, R. I. and Nicoll, R. a (2001) Endogenous cannabinoids mediate retrograde signalling  
430 at hippocampal synapses. *Nature*, **410**, 588–592.
- 431 8. Hohmann, A. G., Suplita, R. L., Bolton, N. M., et al. (2005) An endocannabinoid mechanism  
432 for stress-induced analgesia. *Nature*, **435**, 1108–1112.
- 433 9. Engeli, S., Böhnke, J., Feldpausch, M., et al. (2005) Activation of the peripheral  
434 endocannabinoid system in human obesity. *Diabetes*, **54**, 2838–2843.
- 435 10. Long, T., Hicks, M., Yu, H. C., et al. (2017) Whole-genome sequencing identifies common-to-  
436 rare variants associated with human blood metabolites. *Nat. Genet.*, **49**, 568–578.
- 437 11. Perry, D. K., Carton, J., Shah, A. K., et al. (2000) Serine palmitoyltransferase regulates de  
438 novo ceramide generation during etoposide-induced apoptosis. *J. Biol. Chem.*, **275**, 9078–  
439 9084.
- 440 12. Perry, D. K. and Hannun, Y. A. (1998) The role of ceramide in cell signaling. *Biochim.*  
441 *Biophys. Acta*, **1436**, 233–243.

- 442 13. Laaksonen, R., Ekroos, K., Sysi-Aho, M., et al. (2016) Plasma ceramides predict  
443 cardiovascular death in patients with stable coronary artery disease and acute coronary  
444 syndromes beyond LDL-cholesterol. *Eur. Heart J.*, **37**, 1967–1976.
- 445 14. Haus, J. M., Kashyap, S. R., Kasumov, T., et al. (2009) Plasma ceramides are elevated in  
446 obese subjects with type 2 diabetes and correlate with the severity of insulin resistance.  
447 *Diabetes*, **58**, 337–343.
- 448 15. Demirkan, A., van Duijn, C. M., Ugocsai, P., et al. (2012) Genome-wide association study  
449 identifies novel loci associated with circulating phospho- and sphingolipid concentrations.  
450 *PLoS Genet.*, **8**, e1002490.
- 451 16. Hicks, A. A., Pramstaller, P. P., Johansson, A., et al. (2009) Genetic determinants of  
452 circulating sphingolipid concentrations in European populations. *PLoS Genet.*, **5**, e1000672.
- 453 17. Bellis, C., Kulkarni, H., Mamtani, M., et al. (2014) Human plasma lipidome is pleiotropically  
454 associated with cardiovascular risk factors and death. *Circ. Cardiovasc. Genet.*, **7**, 854–863.
- 455 18. Cadby, G., Melton, P. E., McCarthy, N. S., et al. (2020) Heritability of 596 lipid species and  
456 genetic correlation with cardiovascular traits in the Busselton Family Heart Study. *J. Lipid*  
457 *Res.*, jlr.RA119000594.
- 458 19. Sipe, J. C., Chiang, K., Gerber, A. L., et al. (2002) A missense mutation in human fatty acid  
459 amide hydrolase associated with problem drug use. *Proc. Natl. Acad. Sci.*, **99**, 8394–8399.
- 460 20. Fanelli, F., Di Lallo, V. D., Belluomo, I., et al. (2012) Estimation of reference intervals of five  
461 endocannabinoids and endocannabinoid related compounds in human plasma by two  
462 dimensional-LC/MS/MS. *J. Lipid Res.*, **53**, 481–493.
- 463 21. Bowden, J. A., Heckert, A., Ulmer, C. Z., et al. (2017) Harmonizing lipidomics: NIST  
464 interlaboratory comparison exercise for lipidomics using SRM 1950–Metabolites in Frozen  
465 Human Plasma. *J. Lipid Res.*, **58**, 2275–2288.
- 466 22. Quehenberger, O., Armando, A. M., Brown, A. H., et al. (2010) Lipidomics reveals a  
467 remarkable diversity of lipids in human plasma. *J. Lipid Res.*, **51**, 3299–3305.
- 468 23. Kauhanen, D., Sysi-Aho, M., Koistinen, K. M., et al. (2016) Development and validation of a  
469 high-throughput LC–MS/MS assay for routine measurement of molecular ceramides. *Anal.*

- 470 *Bioanal. Chem.*, **408**, 3475–3483.
- 471 24. Chiang, K. P., Gerber, A. L., Sipe, J. C., et al. (2004) Reduced cellular expression and activity  
472 of the P129T mutant of human fatty acid amide hydrolase: Evidence for a link between defects  
473 in the endocannabinoid system and problem drug use. *Hum. Mol. Genet.*, **13**, 2113–2119.
- 474 25. Astle, W. J., Elding, H., Jiang, T., et al. (2016) The Allelic Landscape of Human Blood Cell  
475 Trait Variation and Links to Common Complex Disease. *Cell*, **167**, 1415–1429.
- 476 26. Nikpay, M., Goel, A., Won, H.-H., et al. (2015) A comprehensive 1,000 Genomes-based  
477 genome-wide association meta-analysis of coronary artery disease. *Nat. Genet.*, **47**, 1121–30.
- 478 27. Mahajan, A., Go, M. J., Zhang, W., et al. (2014) Genome-wide trans-ancestry meta-analysis  
479 provides insight into the genetic architecture of type 2 diabetes susceptibility. *Nat. Genet.*, **46**,  
480 234–244.
- 481 28. Sipe, J. C., Scott, T. M., Murray, S., et al. (2010) Biomarkers of endocannabinoid system  
482 activation in severe obesity. *PLoS One*, **5**, 1–6.
- 483 29. Flanagan, J. M., Gerber, A. L., Cadet, J. L., et al. (2006) The fatty acid amide hydrolase 385  
484 A/A (P129T) variant: Haplotype analysis of an ancient missense mutation and validation of  
485 risk for drug addiction. *Hum. Genet.*, **120**, 581–588.
- 486 30. Sim, M. S., Hatim, A., Reynolds, G. P., et al. (2013) Association of a functional FAAH  
487 polymorphism with methamphetamine-induced symptoms and dependence in a Malaysian  
488 population. *Pharmacogenomics*, **14**, 505–514.
- 489 31. Mach, F., Montecucco, F. and Steffens, S. (2009) Effect of blockage of the endocannabinoid  
490 system by CB1 antagonism on cardiovascular risk. *Pharmacol. Reports*, **61**, 13–21.
- 491 32. Deutsch, D. G. (2016) A personal retrospective: Elevating anandamide (AEA) by targeting  
492 fatty acid amide hydrolase (FAAH) and the fatty acid binding proteins (FABPs). *Front.*  
493 *Pharmacol.*, **7**, 1–7.
- 494 33. Griebel, G., Stemmelin, J., Lopez-Grancha, M., et al. (2018) The selective reversible FAAH  
495 inhibitor, SSR411298, restores the development of maladaptive behaviors to acute and chronic  
496 stress in rodents. *Sci. Rep.*, **8**, 1–25.
- 497 34. Mallet, C., Dubray, C. and Dualé, C. (2016) FAAH inhibitors in the limelight, but regrettably.

- 498 *Int. J. Clin. Pharmacol. Ther.*, **54**, 498–501.
- 499 35. Draisma, H. H. M., Pool, R., Kobl, M., et al. (2015) Genome-wide association study identifies  
500 novel genetic variants contributing to variation in blood metabolite levels. *Nat. Commun.*, **6**,  
501 7208.
- 502 36. Klarin, D., Damrauer, S. M., Cho, K., et al. (2018) Genetics of blood lipids among ~300,000  
503 multi-ethnic participants of the Million Veteran Program. *Nat. Genet.*, **50**, 1514–1523.
- 504 37. Shin, S. Y., Fauman, E. B., Petersen, A. K., et al. (2014) An atlas of genetic influences on  
505 human blood metabolites. *Nat. Genet.*, **46**, 543–550.
- 506 38. Li, Y., Sekula, P., Wuttke, M., et al. (2018) Genome-wide association studies of metabolites in  
507 patients with CKD identify multiple loci and illuminate tubular transport mechanisms. *J. Am.*  
508 *Soc. Nephrol.*, **29**, 1513–1524.
- 509 39. Lang, P. A., Kempe, D. S., Tanneur, V., et al. (2005) Stimulation of erythrocyte ceramide  
510 formation by platelet-activating factor. *J. Cell Sci.*, **118**, 1233–1243.
- 511 40. Ju, X., Silveira, P. A., Hsu, W.-H., et al. (2016) The Analysis of CD83 Expression on Human  
512 Immune Cells Identifies a Unique CD83 + -Activated T Cell Population. *J. Immunol.*, **197**,  
513 4613–4625.
- 514 41. Maceyka, M. and Spiegel, S. (2014) Sphingolipid metabolites in inflammatory disease.  
515 *Nature*, **510**, 58–67.
- 516 42. Hannun, Y. A. and Obeid, L. M. (2008) Principles of bioactive lipid signalling: lessons from  
517 sphingolipids. *Nat. Rev. Mol. Cell Biol.*, **9**, 139–50.
- 518 43. Hilvo, M., Salonurmi, T., Havulinna, A. S., et al. (2018) Ceramide stearic to palmitic acid ratio  
519 predicts incident diabetes. *Diabetologia*, **61**, 1424–1434.
- 520 44. Neeland, I. J., Singh, S., McGuire, D. K., et al. (2018) Relation of plasma ceramides to  
521 visceral adiposity, insulin resistance and the development of type 2 diabetes mellitus: the  
522 Dallas Heart Study. *Diabetologia*, **61**, 2570–2579.
- 523 45. Anroedh, S., Hilvo, M., Akkerhuis, K. M., et al. (2018) Plasma concentrations of molecular  
524 lipid species predict long-term clinical outcome in coronary artery disease patients. *J. Lipid*  
525 *Res.*, **59**, 1729–1737.

- 526 46. Hammad, S. M., Pierce, J. S., Soodavar, F., et al. (2010) Blood sphingolipidomics in healthy  
527 humans: impact of sample collection methodology. *J. Lipid Res.*, **51**, 3074–87.
- 528 47. Keavney, B., Mayosi, B., Gaukrodger, N., et al. (2005) Genetic variation at the locus  
529 encompassing 11-beta hydroxylase and aldosterone synthase accounts for heritability in  
530 cortisol precursor (11-deoxycortisol) urinary metabolite excretion. *J. Clin. Endocrinol. Metab.*,  
531 **90**, 1072–1077.
- 532 48. Baker, M., Rahman, T., Hall, D., et al. (2007) The C-532T polymorphism of the  
533 angiotensinogen gene is associated with pulse pressure: A possible explanation for  
534 heterogeneity in genetic association studies of AGT and hypertension. *Int. J. Epidemiol.*, **36**,  
535 1356–1362.
- 536 49. Vickers, M. A., Green, F. R., Terry, C., et al. (2002) Genotype at a promoter polymorphism of  
537 the interleukin-6 gene is associated with baseline levels of plasma C-reactive protein.  
538 *Cardiovasc. Res.*, **53**, 1029–1034.
- 539 50. Kendall, A. C., Pilkington, S. M., Massey, K. a, et al. (2015) Distribution of Bioactive Lipid  
540 Mediators in Human Skin. *J. Invest. Dermatol.*, **135**, 1510–1520.
- 541 51. Cucchi, D., Camacho-Muñoz, D., Certo, M., et al. (2019) Omega-3 polyunsaturated fatty acids  
542 impinge on CD4+ T cell motility and adipose tissue distribution via direct and lipid mediator-  
543 dependent effects. *Cardiovasc. Res.*, cvz208.
- 544 52. Kendall, A. C., Pilkington, S. M., Murphy, S. A., et al. (2019) Dynamics of the human skin  
545 mediator lipidome in response to dietary  $\omega$ -3 fatty acid supplementation. *FASEB*, **33**, 13014–  
546 13027.
- 547 53. Poolman, T. M., Gibbs, J., Walker, A. L., et al. (2019) Rheumatoid arthritis reprograms  
548 circadian output pathways. *Arthritis Res. Ther.*, **21**, 1–13.
- 549 54. Masukawa, Y., Narita, H., Shimizu, E., et al. (2008) Characterization of overall ceramide  
550 species in human *stratum corneum*. *J. Lipid Res.*, **49**, 1466–1476.
- 551 55. Purcell, S., Neale, B., Todd-Brown, K., et al. (2007) PLINK: A tool set for whole-genome  
552 association and population-based linkage analyses. *Am. J. Hum. Genet.*, **81**, 559–575.
- 553 56. Auton, A., Abecasis, G. R., Altshuler, D. M., et al. (2015) A global reference for human

- 554 genetic variation. *Nature*, **526**, 68–74.
- 555 57. Yang, J., Benyamin, B., McEvoy, B. P., et al. (2010) Common SNPs explain a large  
556 proportion of the heritability for human height. *Nat. Genet.*, **42**, 565–569.
- 557 58. Abecasis, G. R., Cardon, L. R. and Cookson, W. O. (2000) A general test of association for  
558 quantitative traits in nuclear families. *Am. J. Hum. Genet.*, **66**, 279–92.
- 559 59. Loh, P. R., Danecek, P., Palamara, P. F., et al. (2016) Reference-based phasing using the  
560 Haplotype Reference Consortium panel. *Nat. Genet.*, **48**, 1443–1448.
- 561 60. Das, S., Forer, L., Schönherr, S., et al. (2016) Next-generation genotype imputation service  
562 and methods. *Nat. Genet.*, **48**, 1284–1287.
- 563 61. McCarthy, S., Das, S., Kretzschmar, W., et al. (2016) A reference panel of 64,976 haplotypes  
564 for genotype imputation. *Nat. Genet.*, **48**, 1279–1283.
- 565 62. Sudlow, C., Gallacher, J., Green, J., et al. (2015) UK Biobank: an open access resource for  
566 identifying the causes of a wide range of complex diseases of middle and old Age. *PLOS*  
567 *Med.*, **12**, e1001779.
- 568 63. Smith, G. D. and Hemani, G. (2014) Mendelian randomization: Genetic anchors for causal  
569 inference in epidemiological studies. *Hum. Mol. Genet.*, **23**, R89–R98.
- 570

## Figure Legends

### Figure 1: Schematic overview of the biosynthetic pathways for (A) *N*-acyl ethanolamines and (B) ceramides

A) *N*-acyl ethanolamine (NAE) species, including the endocannabinoid anandamide (AEA), are produced through four independent enzymatic pathways from the membrane phospholipid precursor (*N*-acyl phosphatidylethanolamine; NAPE). Fatty acid amide hydrolase (*FAAH*) degrades NAEs to free fatty acids (such as arachidonic acid for AEA) and ethanolamine.

B) Ceramide (CER) species are biosynthesised via the enzyme serine palmitoyltransferase (*SPTLC 1-3*) that converts palmitoyl-CoA and L-serine to 3-keto dihydrosphingosine, in the rate-limiting step of the sphingolipid *de novo* pathway. The resulting dihydrosphingosine is coupled to various fatty acids via ceramide synthases (*CERS*) to generate dihydroceramides CER[NDS] that are further converted to CER[NS] via the enzyme delta 4-desaturase (*DEGSI*). Conversion of these pro-apoptotic CER[NS] species to sphingosine and sphingosine 1-phosphate, with roles in cell survival, degrades ceramides through reversible reactions. CER[NS] are also reversibly converted to sphingomyelin or further metabolised to ceramide 1-phosphate). Measured lipid species are in bold; genes encoding enzymes are in italics; genes identified through SNPs that associated at GWAS with circulating lipid levels are in red.

### Figure 2: Heritability estimates of *N*-acyl ethanolamines and ceramides found in human plasma.

This figure depicts the heritability estimated for each of 25 lipid species in 999 plasma samples using SNP-based GCTA software (y-axis) and reported pedigree-based QTD software (x-axis). This data is presented in detail in Table S8.

### Figure 3: Family-based GWAS results for *N*-acyl ethanolamines and the lead SNP in fatty acid amide hydrolase (*FAAH*).

A) The radar plot depicts the P-value for association between the lead SNP and eQTL of *FAAH* (rs324420) and each of 9 NAE species in 999 plasma samples. The P-values were grouped into “ $<5 \times 10^{-8}$ ” ( $P < 5 \times 10^{-8}$ , outermost ring), “ $\times 10^{-6}$ ” ( $P = 5.0 \times 10^{-8} - 9.9 \times 10^{-6}$  [of which there are no NAE species]), “ $\times 10^{-5}$ ” ( $1.0 \times 10^{-5} - 9.9 \times 10^{-5}$ ), and “NS” (not significant) at the center of the radar.

B) Trend in concentrations of plasma NAE species separated by *FAAH* rs324420 genotype. The figure depicts the mean standardised residuals of the NAE species in participants with the three genotypes at rs324420. The mean is shown with standard error. 51 participants had the AA genotype, 310 had the AC genotype, and 638 had the CC genotype in the cohort.

C) LocusZoom plot of the association of PEA with *FAAH* SNP rs324420. The LocusZoom plot depicts the association of *N*-acyl ethanolamine lipid species PEA with *FAAH* SNP rs324420 on chromosome 1 in 993 plasma samples. The  $r^2$  for each SNP is depicted in colour. The plot was created using the LocusZoom plot tools at <http://locuszoom.sph.umich.edu/>.

### Figure 4: Family-based GWAS results for CER[NS] and precursor CER[NDS] with an exemplar SNP in serine palmitoyltransferase (*SPTLC3*).

A) The radar plot depicts the P-value for association between the lead SNP and liver eQTL of *SPTLC3* (rs680379) with the 13 CER[NS] and 3 CER[NDS] species in 999 plasma samples. The P-values were grouped into “ $<5 \times 10^{-8}$ ” ( $P < 5 \times 10^{-8}$ , outermost ring), “ $\times 10^{-6}$ ” ( $P = 5.0 \times 10^{-8} - 9.9 \times 10^{-6}$ ), “ $\times 10^{-5}$ ” ( $1.0 \times 10^{-5} - 9.9 \times 10^{-5}$ ), and “NS” (not significant) at the center of the radar.

B) Trend in concentrations of plasma ceramide species separated by *SPTLC3* rs680379 genotype. The figure depicts the mean standardised residuals of the ceramide species in participants with the three genotypes at rs680379. The mean is shown with standard error. 409 participants had the GG genotype, 442 had the AG genotype, and 148 had the AA genotype in the cohort.

C) LocusZoom plot of the association of CER[N(24)S(19)] with *SPTLC3* SNP rs680379. The LocusZoom plot depicts the association of CER[N(24)S(19)] with *SPTLC3* SNP rs680379 on chromosome 20 in 991 plasma samples. While there is a group of lead SNPs, this SNP was depicted as it has been identified previously to associate at GWAS with sphingolipid species. The  $r^2$  for each SNP is depicted in colour. The plot was created using the LocusZoom plot tools at



<http://locuszoom.sph.umich.edu/>.

## Tables

**Table 1: Summary statistics for the study participants.**

Data is shown as mean and standard deviation (SD) unless otherwise indicated; BMI, body mass index; WHR, waist-hip ratio.

| Trait                | Mean (SD)    |
|----------------------|--------------|
| Gender               | 47% Male     |
| Hypertensive         | 33%          |
| Mean Blood Pressure  | 138/83 mmHg  |
| Age (years)          | 49 (15)      |
| BMI                  | 26.04 (4.33) |
| WHR                  | 0.86 (0.09)  |
| Cholesterol (mmol/L) | 5.61 (1.20)  |

## Abbreviations

*N*-acyl ethanolamine (NAE); ceramide (CER); expression quantitative trait loci (eQTL); heritability ( $h^2$ ); single nucleotide polymorphism (SNP); ultra performance liquid chromatography and tandem mass spectrometry (UPLC-MS/MS); Anandamide (*N*-arachidonoyl ethanolamide) (AEA); *N*-docosahexaenoyl ethanolamide (DHEA); *N*-docosapentaenoyl ethanolamine (DPEA); *N*-linoleoyl ethanolamide (LEA); *N*-oleoyl ethanolamide (OEA); *N*-palmitoyl ethanolamide (PEA); *N*-vaccinoyl ethanolamide (VEA); *N*-stearoyl ethanolamide (STEA); *N*-heptadecanoyl ethanolamide (HEA).

**A**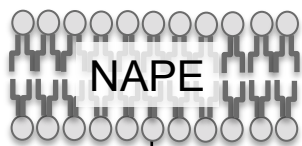

1. *NAPE-PLD*
2. *PLC, PTPN22*
3. *ABHD4, GDE1*
4. *PLA2G2A, PLD, GDE4, GDE7*

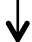**NAE**

AEA, PEA, OEA, DHEA,  
SEA, VEA, HEA, LEA,  
DPEA, POEA, PDEA

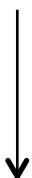*FAAH*

Fatty acid  
+  
Ethanolamine

**B**

Palmitoyl-CoA + L-serine

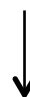*SPTLC 1-3*

3-keto dihydrosphingosine

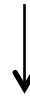

Sphinganine

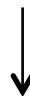*CERS***CER[NDS]**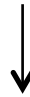*DEGS1***CER[NS]**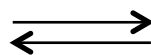

Sphingosine

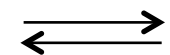Sphingosine  
1-phosphate*SGPP 1-2*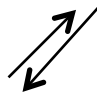

Sphingomyelin

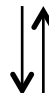Ceramide  
1-phosphate

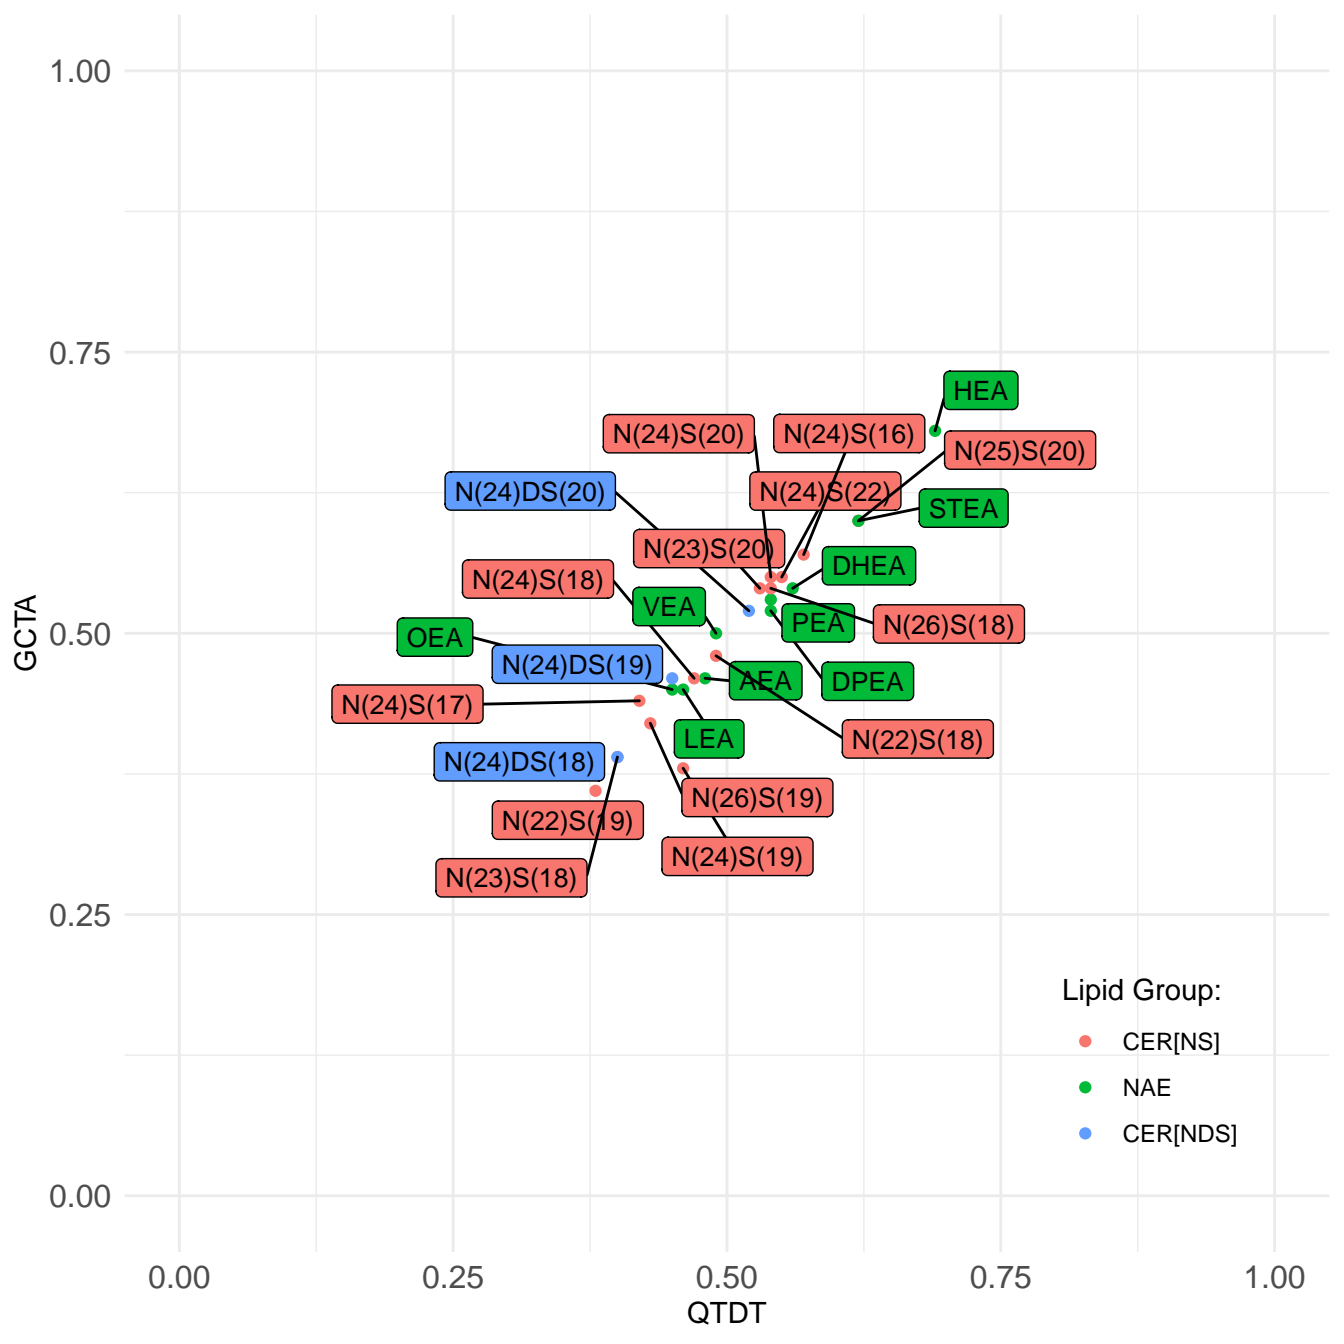

rs324420  $<5 \times 10^{-8}$  ■  $\times 10^{-5}$  ■ NS ■

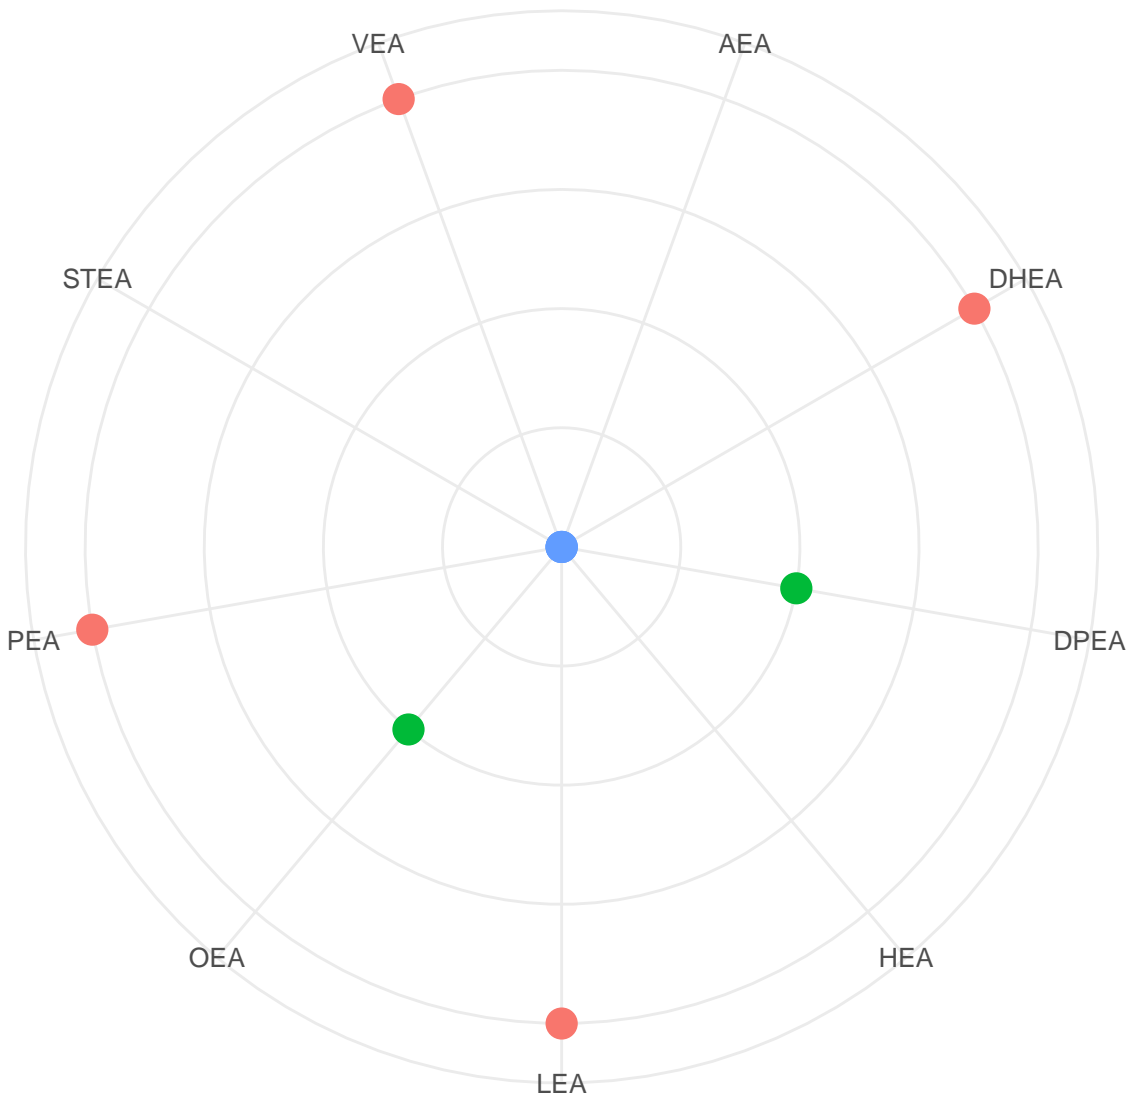

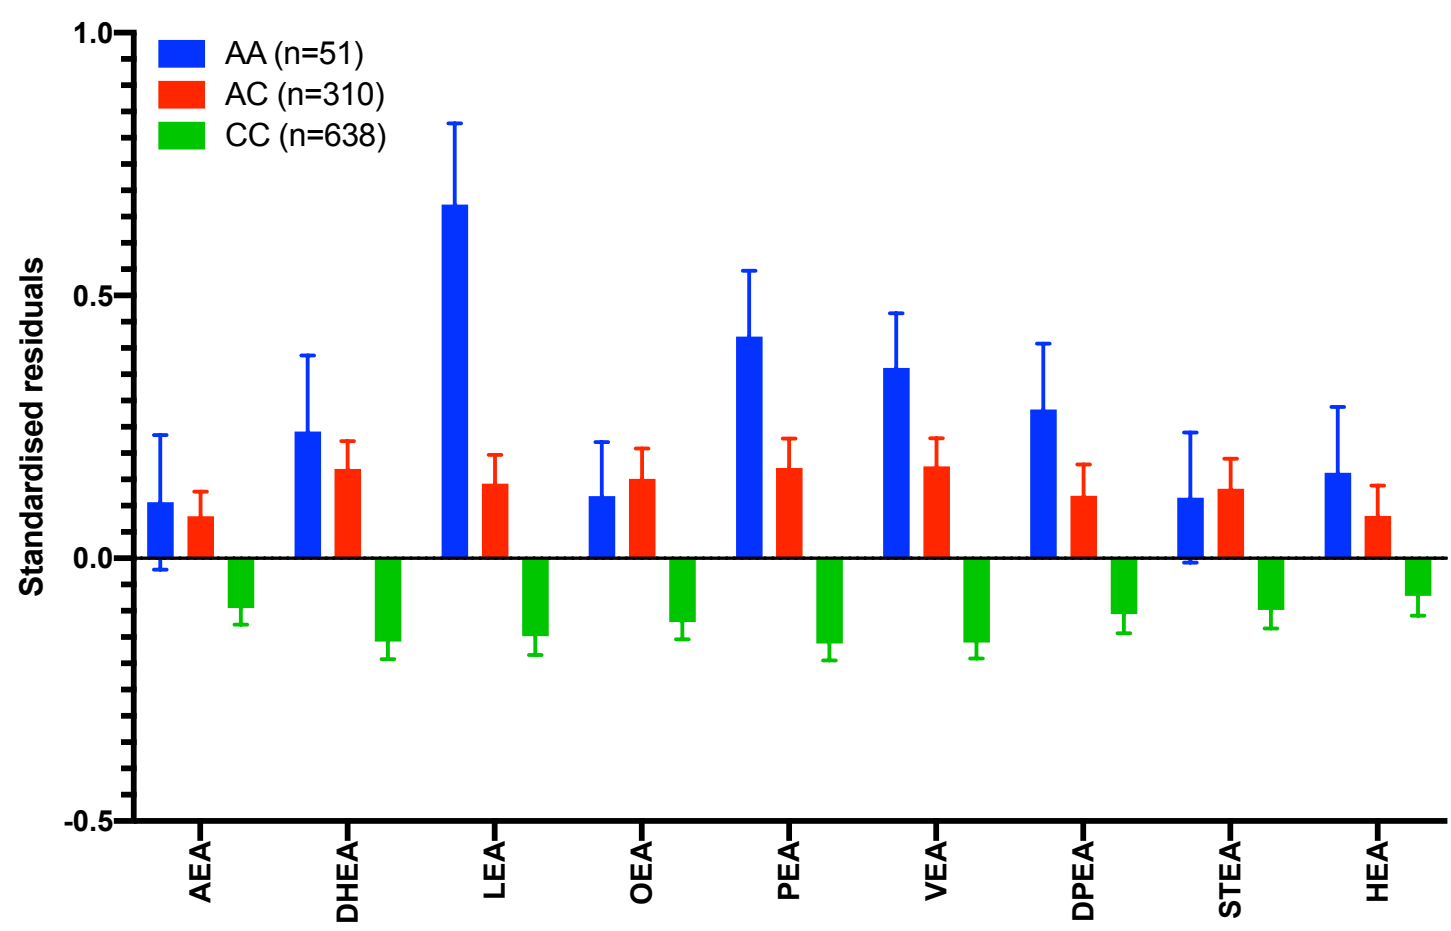

Plotted SNPs

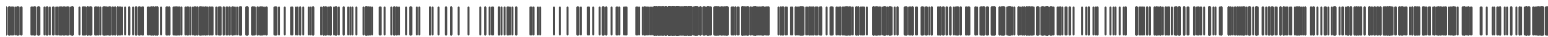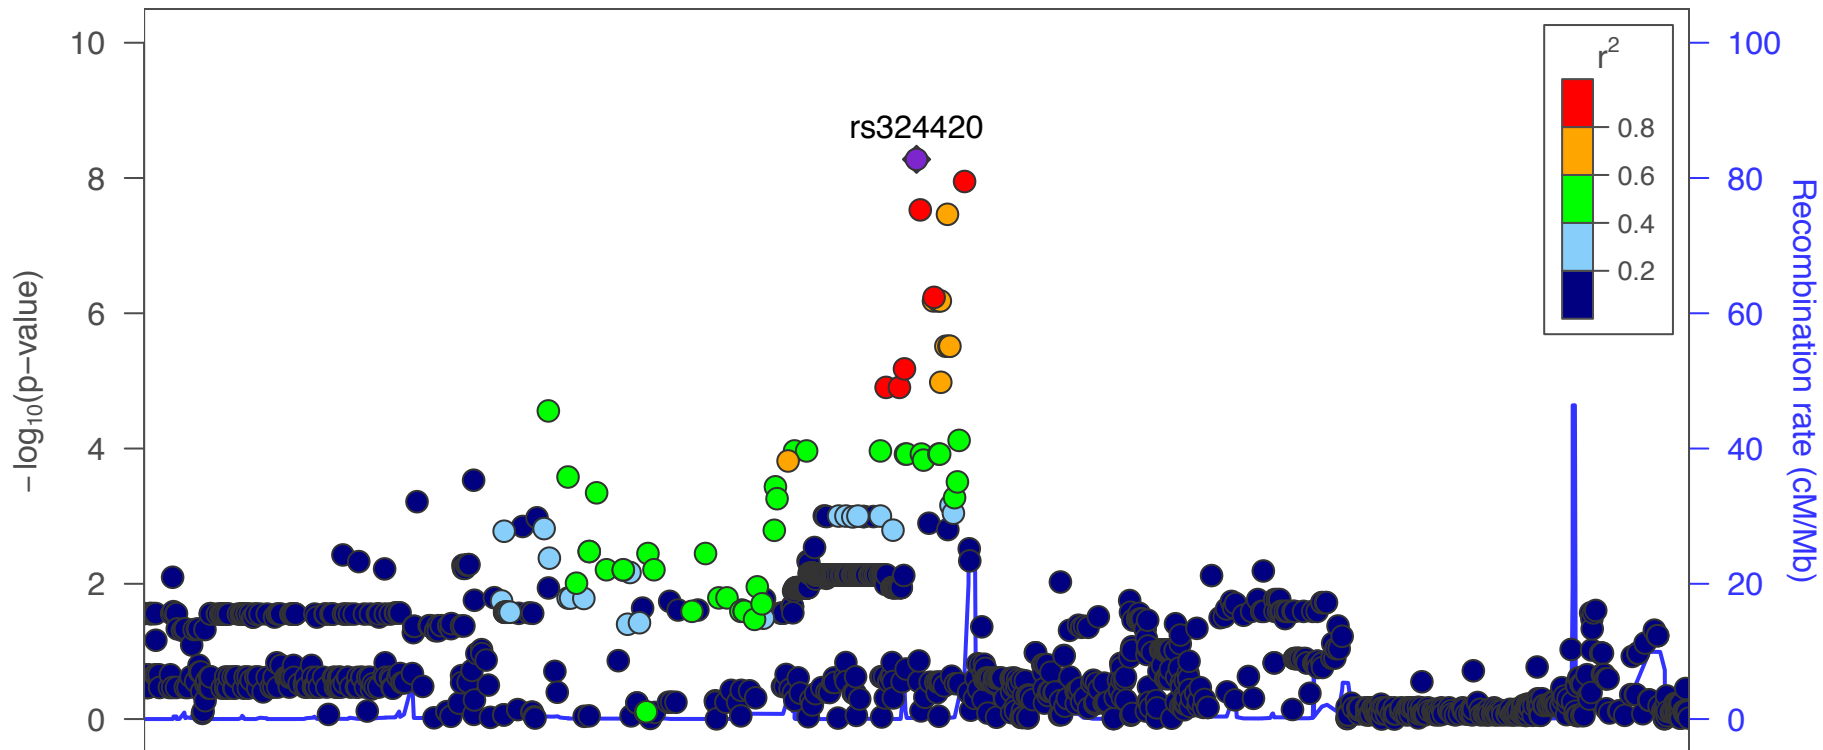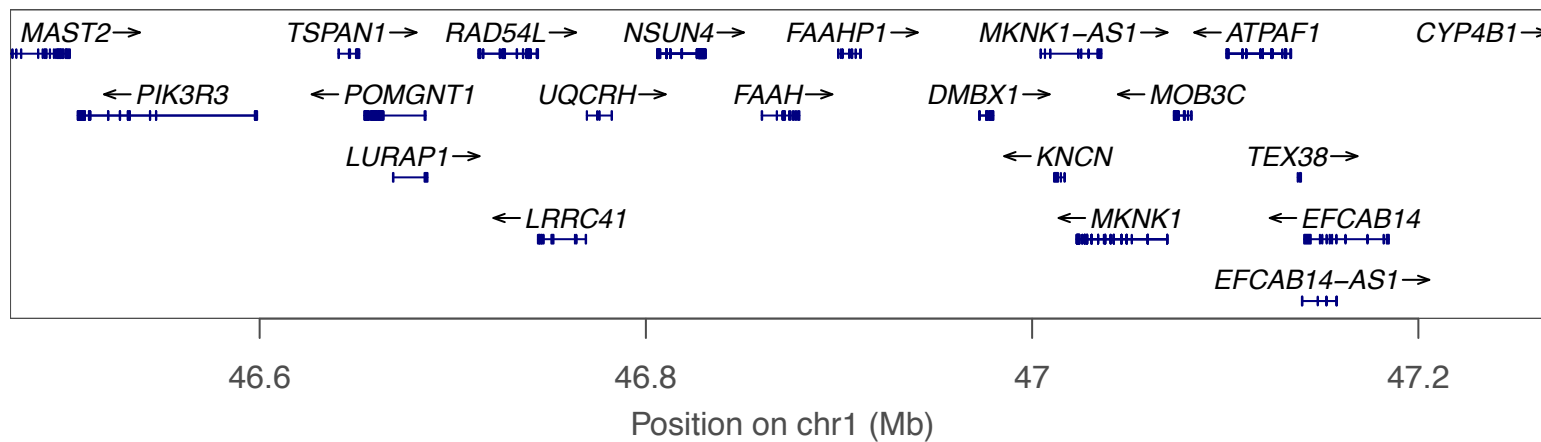

rs680379  $<5 \times 10^{-8}$   $\times 10^{-6}$   $\times 10^{-5}$  NS

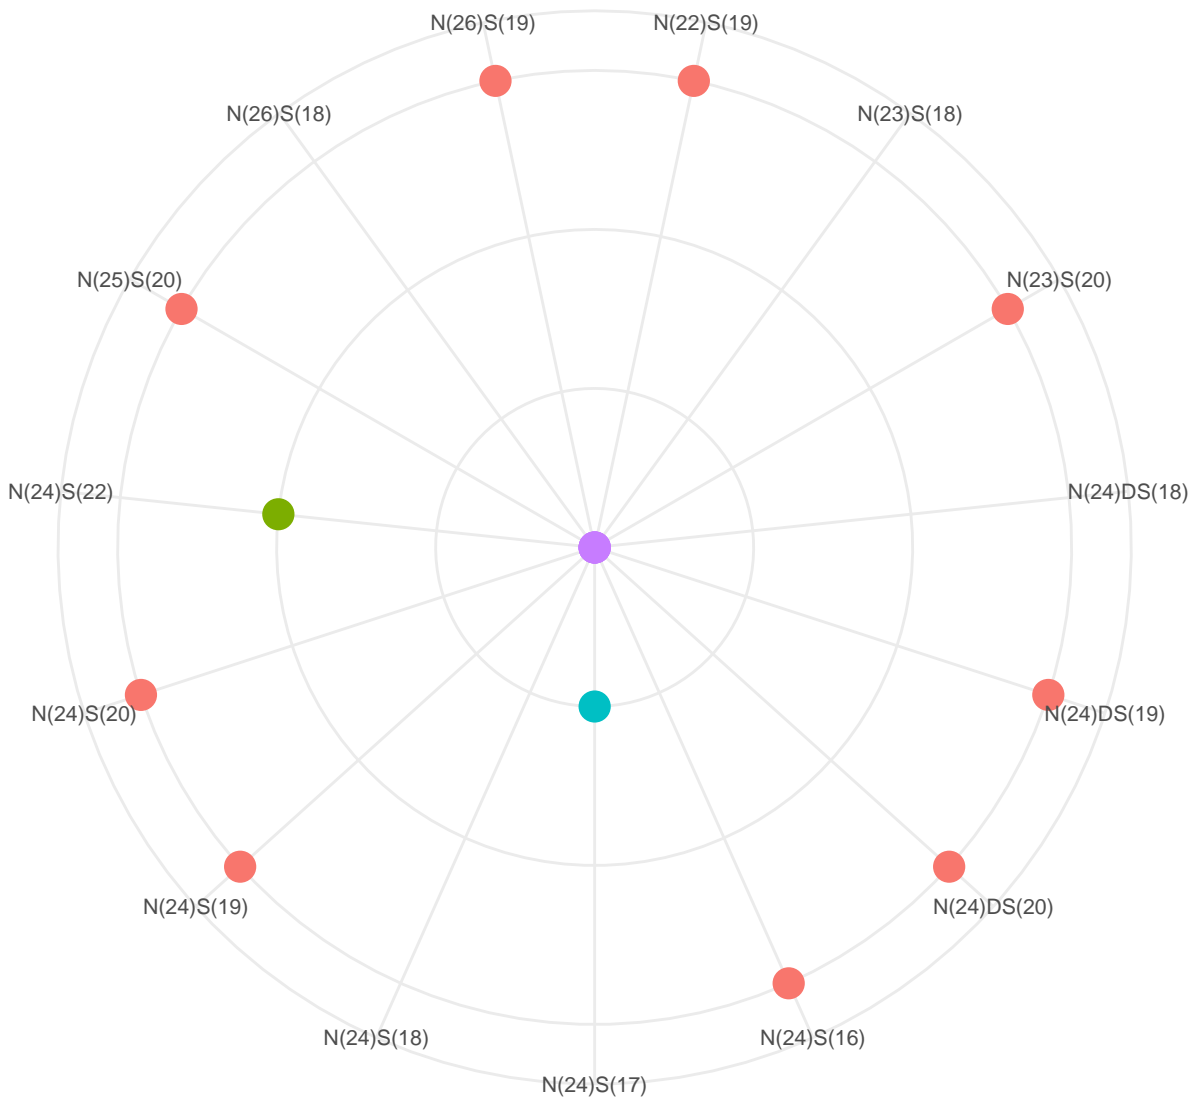

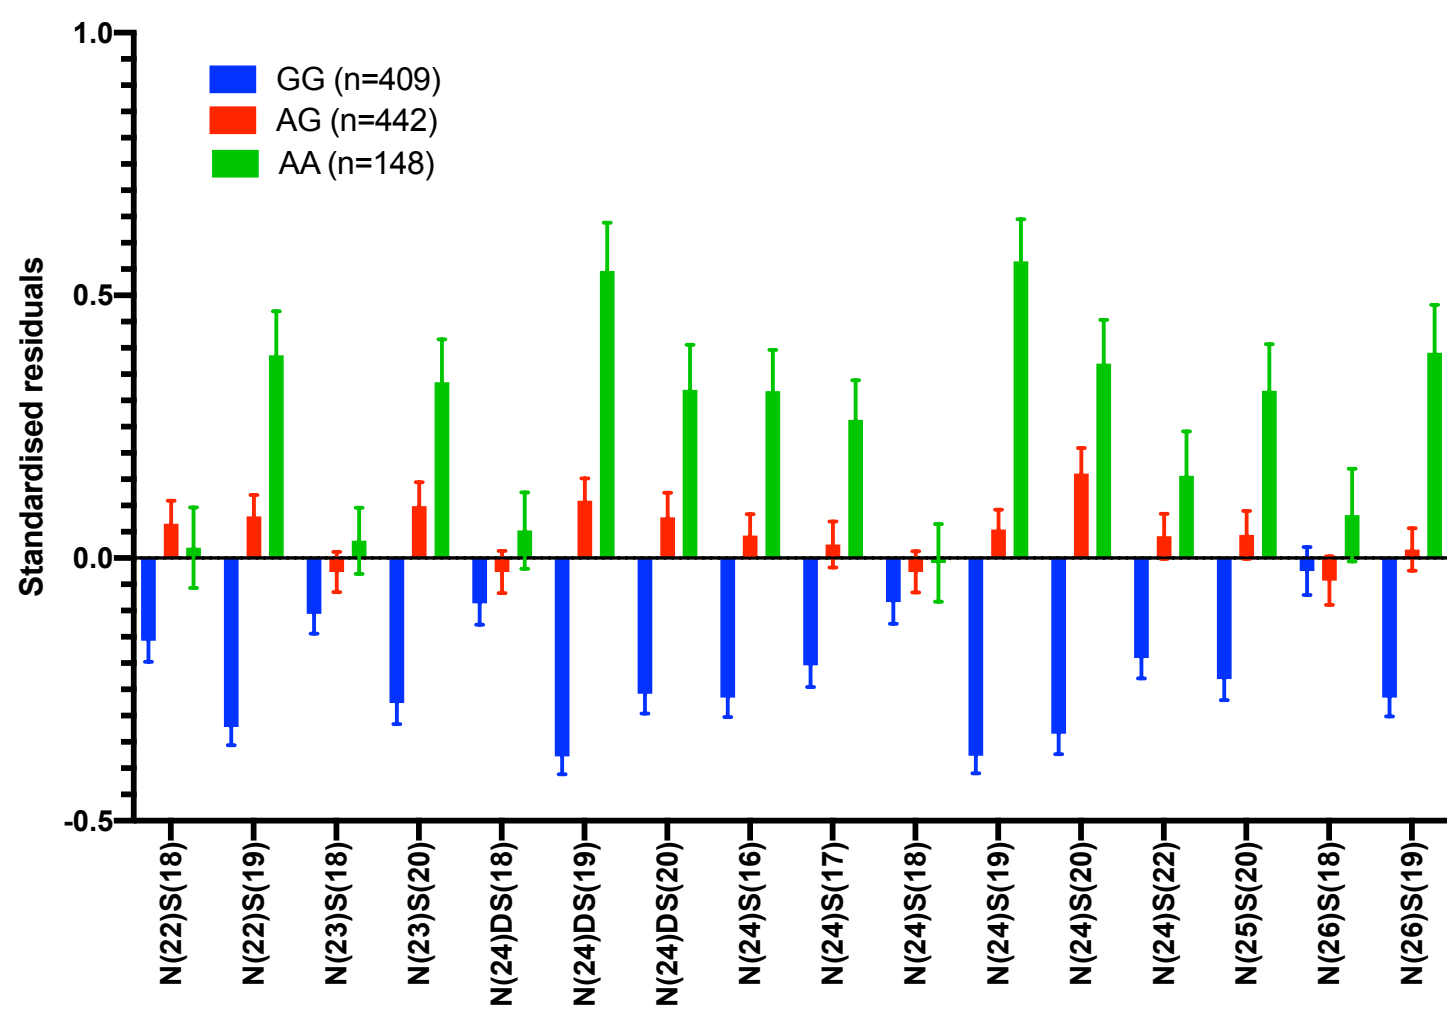



Plotted SNPs

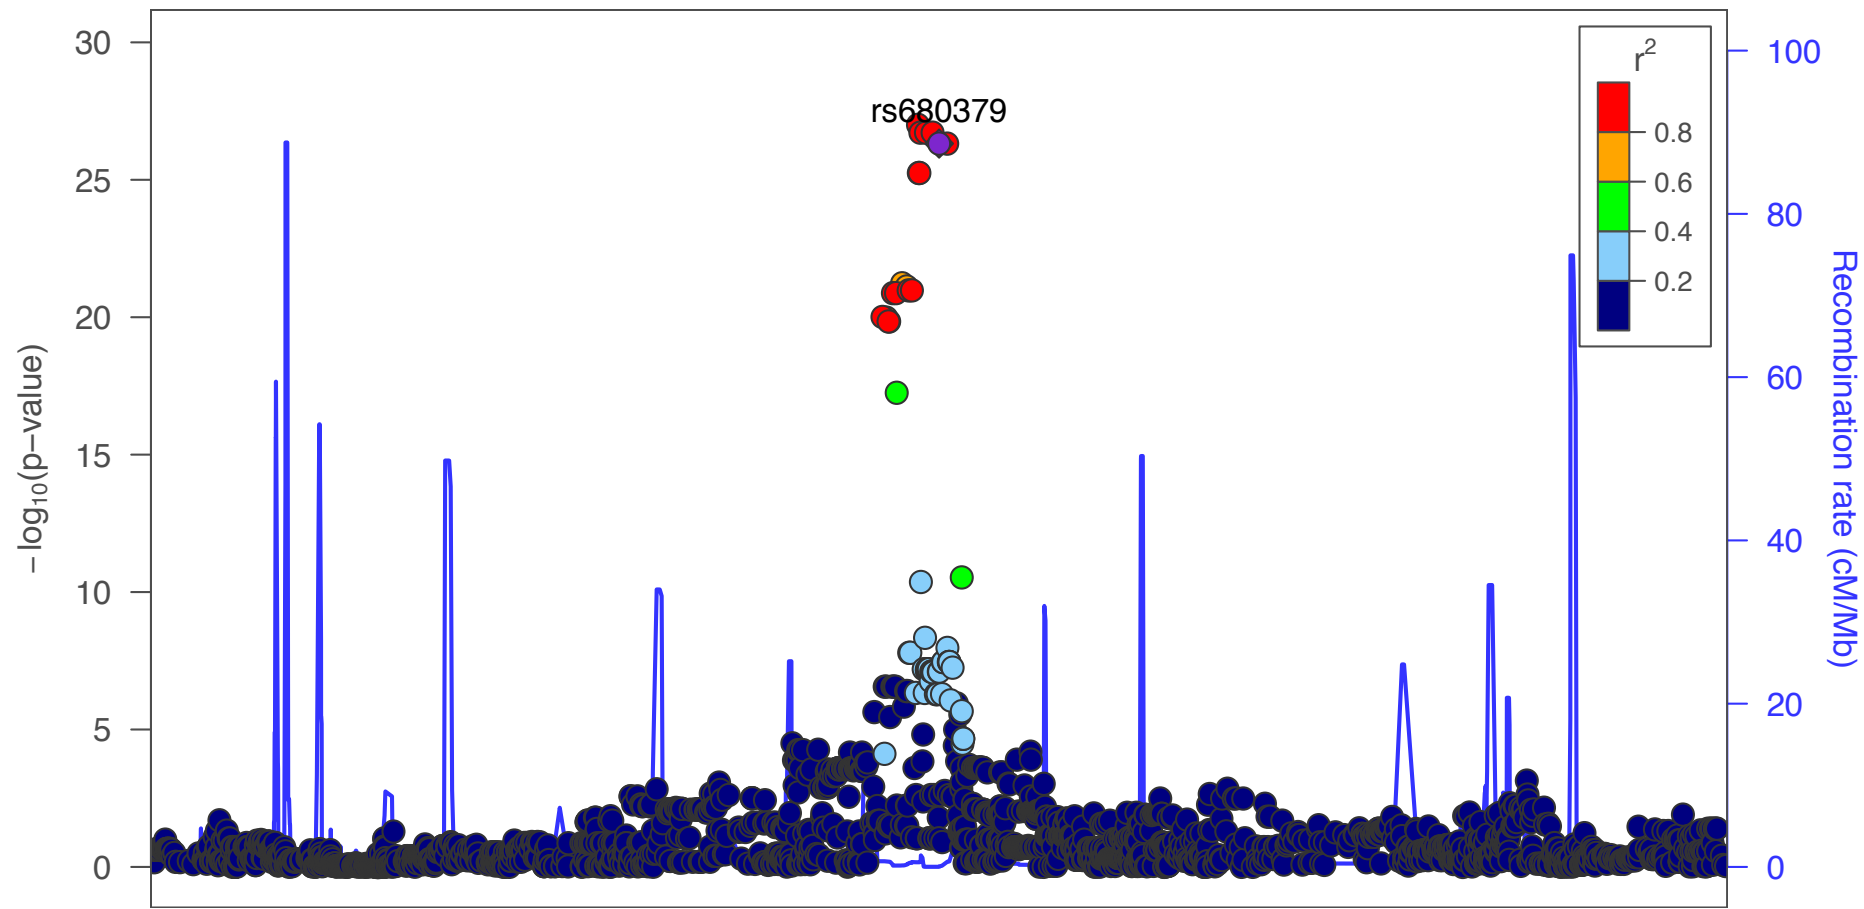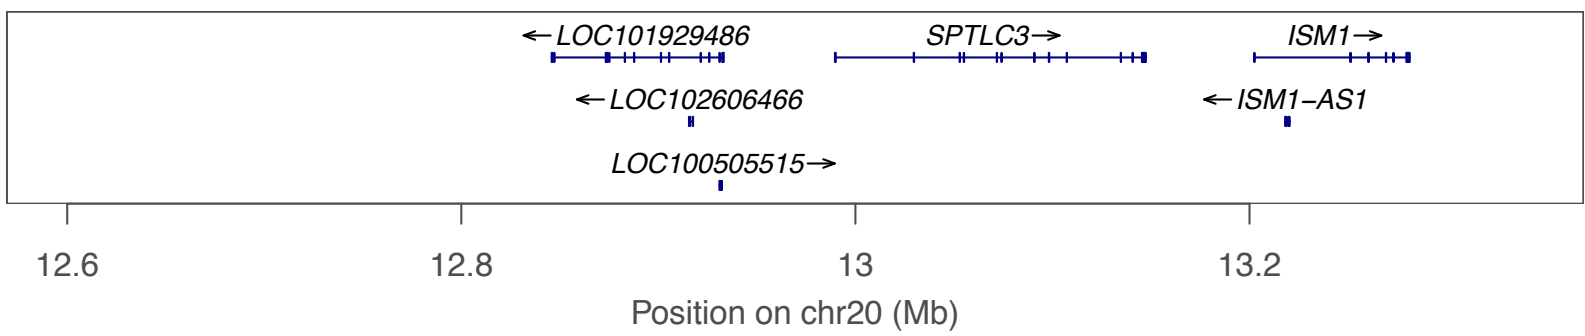

Source: https://www.biorxiv.org/content/biorxiv/early/2020/08/01/815654.full.pdf
